# Supplementary material for: A double-blind, placebo-controlled, randomised, multicentre, proof-of-concept and dose-finding phase II clinical trial to investigate the safety, tolerability and efficacy of adrecizumab in patients with septic shock and elevated adrenomedullin concentration (AdrenOSS-2)
Source: PubMed Central journal article supplement — BMJ Open. 2019 Feb 6;9(2):e024475. doi: 10.1136/bmjopen-2018-024475 (PMC6377571; doi:10.1136/bmjopen-2018-024475), 2019-02-06
Supplement: bmjopen-2018-024475.draft_revisions.pdf [file bmjopen-2018-024475.draft_revisions.pdf]

# BMJ Open

BMJ Open is committed to open peer review. As part of this commitment we make the peer review history of every article we publish publicly available.

When an article is published we post the peer reviewers' comments and the authors' responses online. We also post the versions of the paper that were used during peer review. These are the versions that the peer review comments apply to.

The versions of the paper that follow are the versions that were submitted during the peer review process. They are not the versions of record or the final published versions. They should not be cited or distributed as the published version of this manuscript.

BMJ Open is an open access journal and the full, final, typeset and author-corrected version of record of the manuscript is available on our site with no access controls, subscription charges or pay-per-view fees (<http://bmjopen.bmj.com>).

If you have any questions on BMJ Open's open peer review process please email [info.bmjopen@bmj.com](mailto:info.bmjopen@bmj.com)

# BMJ Open

**Study protocol: A Double Blind, Placebo-Controlled, Randomized, Multicenter, Proof of Concept and Dose-finding Phase II Clinical Trial to Investigate the Safety, Tolerability and Efficacy of Adrecizumab in Patients with Septic Shock and Elevated Adrenomedullin concentration (AdrenOSS-2)**

|                               |                                                                                                                                                                                                                                                                                                                                                                                                                                                                                                                                                                                                                                                                                                                                                                   |
|-------------------------------|-------------------------------------------------------------------------------------------------------------------------------------------------------------------------------------------------------------------------------------------------------------------------------------------------------------------------------------------------------------------------------------------------------------------------------------------------------------------------------------------------------------------------------------------------------------------------------------------------------------------------------------------------------------------------------------------------------------------------------------------------------------------|
| Journal:                      | <i>BMJ Open</i>                                                                                                                                                                                                                                                                                                                                                                                                                                                                                                                                                                                                                                                                                                                                                   |
| Manuscript ID                 | bmjopen-2018-024475                                                                                                                                                                                                                                                                                                                                                                                                                                                                                                                                                                                                                                                                                                                                               |
| Article Type:                 | Protocol                                                                                                                                                                                                                                                                                                                                                                                                                                                                                                                                                                                                                                                                                                                                                          |
| Date Submitted by the Author: | 29-May-2018                                                                                                                                                                                                                                                                                                                                                                                                                                                                                                                                                                                                                                                                                                                                                       |
| Complete List of Authors:     | Geven, Christopher; Radboudumc, Intensive Care Medicine<br>Blet, Alice; University Hospitals Saint-Louis – Lariboisière, Department of Anesthesia, Burn and Critical Care; Inserm, UMR-S 942<br>Kox, Matthijs; Radboud University Medical Centre, Intensive Care Medicine<br>Hartmann, Oliver; Adrenomed AG<br>Scigalla, Paul; Adrenomed AG<br>Zimmermann, Jens; Adrenomed AG<br>Marx, Gernot; University of Aachen, Department Intensive Care Medicine<br>Laterre, Pierre-François; Cliniques Universitaires Saint-Luc, Department of Critical Care Medicine<br>Mebazaa, Alexandre; University Hospitals Saint-Louis – Lariboisière, Department of Anesthesia, Burn and Critical Care; Inserm, UMR-S 942<br>Pickkers, Peter; Radboudumc, Intensive Care Medicine |
| Keywords:                     | Sepsis, Adrecizumab, Adrenomedullin, Septic shock, Vascular integrity, Phase II clinical trial                                                                                                                                                                                                                                                                                                                                                                                                                                                                                                                                                                                                                                                                    |
|                               |                                                                                                                                                                                                                                                                                                                                                                                                                                                                                                                                                                                                                                                                                                                                                                   |

SCHOLARONE™  
Manuscripts

1  
2  
3 1  
4  
5 2  
6  
7 3  
8  
9 4  
10  
11 5  
12  
13 6  
14  
15 7  
16  
17 8  
18  
19 9  
20  
21 10  
22  
23 11  
24  
25 12  
26  
27 13  
28  
29 14  
30  
31 15  
32  
33 16  
34  
35 17  
36  
37 18  
38  
39 19  
40  
41 20  
42  
43 21  
44  
45 22  
46  
47 23  
48  
49 24  
50  
51 25  
52  
53 26  
54  
55 27  
56  
57 28  
58  
59 29  
60

**Study protocol: A Double Blind, Placebo-Controlled, Randomized, Multicenter, Proof of Concept and Dose-finding Phase II Clinical Trial to Investigate the Safety, Tolerability and Efficacy of Adrecizumab in Patients with Septic Shock and Elevated Adrenomedullin concentration (AdrenOSS-2)**

**Authors**

Christopher Geven<sup>1\*</sup>, Alice Blet<sup>2\*</sup>, Matthijs Kox<sup>1</sup>, Oliver Hartmann<sup>3</sup>, Paul Scigalla<sup>3</sup>, Jens Zimmermann<sup>3</sup>, Gernot Marx<sup>4\*</sup>, Pierre-Francois Laterre<sup>5\*</sup>, Alexandre Mebazaa<sup>2\*</sup>, Peter Pickkers<sup>1\*</sup>

<sup>1</sup>Department of Intensive Care Medicine, Radboud Center for Infectious Diseases (RCI), Radboud university medical center, HP: 710, PO Box 9101, 6500 HB Nijmegen, The Netherlands.

<sup>2</sup>Department of Anesthesia, Burn and Critical Care, University Hospitals Saint-Louis – Lariboisière, AP-HP, Paris, France. UMR-S 942, Inserm, Paris, France. Paris Diderot University, Sorbonne Paris Cité, Paris, France.

<sup>3</sup>Adrenomed AG, Neuendorfstraße 15A, D-16761 Hennigsdorf, Germany.

<sup>4</sup>Department of Intensive Care Medicine and Intermediate Care, RWTH University Hospital Aachen, Aachen, Germany.

<sup>5</sup>Department of Critical Care Medicine, Cliniques Universitaires Saint-Luc, Université Catholique de Louvain (UCL), Brussels, Belgium.

\* Christopher Geven and Alice Blet contributed equally to the manuscript.

\* Pierre-Francois Laterre, Gernot Marx, Alexandre Mebazaa and Peter Pickkers share senior authorship as steering committee members of the AdrenOSS-2 trial.

**Corresponding author:** Prof. Dr. Peter Pickkers. Radboud university medical center, Department of Intensive Care Medicine (710), PO Box 9101, 6500 HB, Nijmegen, The Netherlands. E-mail: [peter.pickkers@radboudumc.nl](mailto:peter.pickkers@radboudumc.nl)

1  
2  
3 30 **Word Counts:**

4 31 **Abstract:** 299      **Text:** 4275 (excluding abstract, table and references)  
5  
6  
7 32

8 33 **Keywords:** Adrenomedullin; Adrecizumab; sepsis; septic shock; endothelium; vascular integrity;  
9  
10 34 antibody; phase II.  
11  
12  
13 35

14 36 **Abstract**

15  
16 37 **Introduction:** Sepsis remains a major health problem with an increasing incidence, high morbidity  
17  
18 38 and high mortality. Apart from treatment with antibiotics and organ support, no approved specific  
19  
20 39 adjunct therapies currently exist. Adrenomedullin (ADM) is a vasoactive peptide. High plasma  
21  
22 40 concentrations of ADM correlate with worse outcome in sepsis patients. Preclinical work with the  
23  
24 41 non-neutralizing ADM-binding antibody Adrecizumab showed promising effects in animal models of  
25  
26 42 septic shock, including improved vascular barrier function, reduced vasopressor demand and organ  
27  
28 43 dysfunction, and increased survival. Therapeutic use of Adrecizumab may therefore improve outcome  
29  
30 44 in critically ill patients with septic shock and high ADM plasma concentrations. Phase I studies in  
31  
32 45 healthy volunteers did not reveal any safety concerns. In this biomarker-guided trial, the safety and  
33  
34 46 efficacy of Adrecizumab will be investigated in patients with septic shock.  
35

36 47 **Methods and analysis:** We describe a phase II, randomized, double blind, placebo-controlled,  
37  
38 48 biomarker-guided, proof of concept and dose-finding clinical trial in patients with early septic shock  
39  
40 49 and high concentration of circulating ADM. A total of 300 patients will be enrolled at approx. 30 sites  
41  
42 50 within the European Union. Patients are randomized to receive active treatment (2 and 4 mg/kg  
43  
44 51 Adrecizumab) or placebo, in a 1:1:2 ratio. Patient selection is not only guided by clinical parameters,  
45  
46 52 but also biomarker-guided by measurement of circulating biologically active ADM concentration at  
47  
48 53 admission. Primary endpoint is safety and tolerability of Adrecizumab over a 90 day period. A key  
49  
50 54 secondary endpoint is the Sepsis Severity Index (SSI) over a 14-day period.  
51

52 55 **Ethics and dissemination:** This study is approved by relevant institutional review boards/independent  
53  
54 56 ethics committees and is conducted in accordance with the ethical principles of the Declaration of  
55  
56  
57  
58  
59

1  
2  
3 57 Helsinki, the European Medicines Agency guidelines of Good Clinical Practice, and all other  
4 58 applicable regulations. Results of this study will be published in a peer-reviewed scientific journal.

59

60 **Trial registration number:** NCT03085758

61

### 62 **Strengths and limitations of this study**

- 63 • Extensive preclinical work and phase I studies showed promising results and favourable safety of  
64 Adrecizumab, paving the way for this phase II study.
- 65 • As a non-neutralizing antibody of adrenomedullin, Adrecizumab's mode of action is novel, as it is  
66 not a traditional therapy with complete neutralization of its target. Adrecizumab is thought to  
67 negate detrimental effects of interstitial ADM on vascular tone, while augmenting beneficial  
68 effects of circulating ADM on the vascular endothelium.
- 69 • Patient selection is not only guided by clinical parameters, but also biomarker-guided by  
70 measurement of circulating biologically active plasma adrenomedullin, allowing to select patients  
71 with an impaired outcome who may benefit most from Adrecizumab therapy.
- 72 • The key secondary endpoint and primary *efficacy* endpoint is the composite Sepsis Support Index,  
73 which combines all-cause mortality and organ dysfunction, aimed to be more sensitive to assess  
74 the efficacy of the treatment.
- 75 • Strict in- and exclusion criteria, as well as the brief time-window for inclusion (within 12 hours  
76 following the initiation of vasopressor therapy) may limit generalisation of the results for the  
77 entire population of critically ill patients with sepsis, although this may facilitate detection of an  
78 efficacy signal.

## 79 Introduction

80 Worldwide, sepsis is a major health problem, with an increasing incidence and high mortality.<sup>1-3</sup> It is  
81 defined as life-threatening organ dysfunction caused by a dysregulated host response to infection.<sup>4</sup>  
82 Septic shock is defined as a subset of sepsis in which profound circulatory, cellular, and metabolic  
83 abnormalities occur, which are associated with an increased risk of mortality.<sup>4</sup> The most prominent  
84 abnormalities are vasodilation and loss of vascular integrity, resulting in hypotension, and ultimately,  
85 in organ dysfunction and death.<sup>5</sup> Besides antibiotics and organ supportive therapies such as  
86 vasopressors, mechanical ventilation and renal replacement therapy (RRT), there are currently no  
87 sepsis-specific adjunctive therapies registered.

88  
89 Adrenomedullin (ADM) is a vasoactive peptide hormone that plays an important role in sepsis.  
90 Circulating ADM exerts endothelial barrier-stabilizing effects and maintains vascular integrity.<sup>6-10</sup>  
91 ADM has vasodilatory properties in the vascular interstitium, and at high concentrations, as observed  
92 during sepsis, may contribute to hypotension.<sup>11-13</sup> Elevated concentrations of plasma ADM at  
93 admission have been reported in septic patients, and these were correlated with vasopressor  
94 requirement, organ dysfunction and mortality.<sup>14-16</sup> The cut-off value of biologically active ADM (bio-  
95 ADM) of 70 pg/mL at admission was found to predict mortality for sepsis patients.<sup>14</sup> This cut-off has  
96 been validated in independent, large multicentre studies.<sup>15 17 18</sup>

97  
98 Based on these data, ADM may be an interesting therapeutic target for sepsis. A potential new  
99 adjunctive therapy for the treatment of septic shock is Adrecizumab (previously also known as  
100 HAM8101). It is a *non-neutralizing* ADM-binding antibody that has shown beneficial effects in  
101 preclinical studies. Adrecizumab reduced vascular leakage, organ dysfunction and need for  
102 vasopressor treatment during cecal ligation and puncture (CLP) induced sepsis in several animal  
103 studies, and improved urine output and survival.<sup>19-21</sup> Importantly, Adrecizumab administration was not  
104 associated with any safety concerns in the first-in-human phase I study in healthy volunteers<sup>22 24</sup> and in  
105 a follow-up study in healthy volunteers which were intravenously challenged with lipopolysaccharide  
106 (LPS) to induce systemic inflammation.<sup>23 24</sup> Of note, in the latter study, LPS-induced flu-like

1  
2  
3 107 symptoms resolved more swiftly in Adrecizumab-treated subjects compared to the placebo group.  
4  
5 108 Pharmacokinetic analysis of Adrecizumab showed a half-life of approximately 14 days, indicating that  
6  
7 109 administration of a single dose is sufficient to achieve excess of plasma concentrations of the antibody  
8  
9 110 over adrenomedullin for the entire sepsis period.

10  
11 111  
12 112 Based on these preclinical and human phase I data, it is hypothesised that therapeutic use of  
13  
14 113 Adrecizumab may improve endothelial dysfunction, restore and maintain vascular integrity and  
15  
16 114 augment hemodynamics in critically ill patients with sepsis and septic shock. In the trial described in  
17  
18 115 the present work, the safety, tolerability and efficacy of Adrecizumab is investigated in patients with  
19  
20 116 early septic shock and elevated concentrations of circulating bio-ADM. This will be one of the first  
21  
22 117 precision medicine, biomarker-guided studies in septic patients.  
23  
24 118

## 26 119 **Methods and analysis**

### 28 120 *Design and setting*

29  
30 121 AdrenOSS-2 is a phase II, randomized, double blind, placebo-controlled, biomarker-guided, proof of  
31  
32 122 concept and dose-finding clinical trial that is currently being conducted in patients with early septic  
33  
34 123 shock and elevated concentration of circulating bio-ADM (> 70 pg/ml). A total of 300 patients will be  
35  
36 124 recruited in medical, surgical and mixed Intensive Care Units (ICU) at approx. 30 sites across  
37  
38 125 Belgium, France, Germany, the Netherlands and Italy. Patient selection is guided by clinical  
39  
40 126 parameters as well as by biomarker concentrations, by measuring circulating bio-ADM (sphingotest<sup>®</sup>  
41  
42 127 bio-ADM, sphingotec GmbH, Hennigsdorf, Germany).<sup>25</sup> Based upon preclinical studies, two dosages  
43  
44 128 of Adrecizumab will be investigated (2 and 4 mg/kg bodyweight), in addition to a placebo control arm.  
45  
46 129 After informed consent has been signed by the patient or his/her legal representative, circulating bio-  
47  
48 130 ADM concentrations will be assessed. If bio-ADM concentrations are > 70 pg/mL, the clinical  
49  
50 131 coordination center (CCC) will be contacted for final confirmation of patient eligibility and the patient  
51  
52 132 will be randomized. An interim analysis for futility is planned after 150 patients have completed day  
53  
54 133 28 of the study. An overview of the study design is depicted in Figure 1 and study procedures in  
55  
56 134 Figure 2.

1  
2  
3 135 *Primary objective*

4 136 The primary objective is safety and tolerability, consisting of: mortality possibly related to  
5  
6 137 Adrecizumab, interruption of infusion due to suspected intolerability of Adrecizumab, new treatment-  
7  
8 138 emergent adverse events possibly related to Adrecizumab, and changes in severity and frequency of  
9  
10 139 treatment-emergent adverse events. During the study, an independent Data and Safety Monitoring  
11  
12 140 Board (DSMB) will review safety data on at least a monthly base.  
13

14  
15 141

16 142 *Secondary objectives*

17  
18 143 The secondary objectives are related to the efficacy and pharmacokinetics (PK) of Adrecizumab. The  
19  
20 144 primary efficacy endpoint, the “Sepsis Support Index” (SSI), is a composite endpoint reflecting organ  
21  
22 145 dysfunction or death within the first 14 days of follow-up. More precisely: within the first 14 days of  
23  
24 146 follow-up, every day on which a vasopressor or mechanical ventilation is used, or renal dysfunction  
25  
26 147 (defined as renal SOFA = 4) is apparent, or the patient is not alive anymore, is counted as 1. The sum  
27  
28 148 over the 14 day follow-up period is defined as the SSI score, which can have a maximum of 14 and a  
29  
30 149 minimum of 1 (as vasopressor usage on day 1 is an inclusion criteria). The calculation of the SSI is  
31  
32 150 further illustrated in Figure 3.

33  
34 151 Additional secondary objectives include: SSI at day 28 of follow-up, penalized SSI (pSSI) (patients  
35  
36 152 who die get penalized with the maximum score), individual SSI components, persistent organ  
37  
38 153 dysfunction or death at day 14 and 28 of follow-up<sup>26</sup>, day 28 and day 90 mortality rate and quality of  
39  
40 154 life (Euro-QoL-5), change over time in SOFA and other parameters such as APACHE II score and  
41  
42 155 functional parameters (including, but not limited to heart rate, blood pressure, PaO<sub>2</sub>/FiO<sub>2</sub>, fluid  
43  
44 156 balance, blood lactate, creatinine, pro-enkephalin, MR-proADM, inflammatory markers, including  
45  
46 157 PCT and IL-6), and length of stay at ICU/ hospital.

47  
48 158 For the PK sub-study (n=80 patients), endpoints are key PK parameters, including peak plasma  
49  
50 159 concentrations [C<sub>max</sub>], systemic exposure [AUC], volume of distribution [V], systemic clearance [CL]  
51  
52 160 and elimination half-life [t<sub>1/2</sub>] of Adrecizumab.  
53

54  
55 161

56 162 *Patient selection*



1  
2  
3 163 A total of 300 adult patients with early septic shock and elevated bio-ADM concentration will be  
4  
5 164 randomized. Early septic shock is defined as sepsis with hypotension (MAP < 65 mmHg) refractory to  
6  
7 165 fluid resuscitation and requiring vasopressor therapy.<sup>4</sup> Patients with a measurement of circulating bio-  
8  
9 166 ADM > 70 pg/mL will be eligible to be randomized. The window for inclusion and infusion of study  
10  
11 167 medication is 12 hours following initiation of vasopressor therapy. A lactate concentration > 2 mmol/L  
12  
13 168 is not an inclusion criteria, as concentrations may change quickly in response to initial therapy.  
14  
15 169 Patients will be screened for clinical inclusion and exclusion criteria (Table 1). Eligibility will be  
16  
17 170 confirmed by the CCC in Brussels, Belgium. Patients that fulfil all inclusion criteria and none of the  
18  
19 171 exclusion criteria will be eligible to be randomized.

20  
21 17222 173 **Table 1.** In- and exclusion criteria.23  
24 174 **Inclusion criteria**

- 25 175 1. Written informed consent by patient or legal representative (according to country – specific regulations)
- 26 176 2. Male and female patient, age ≥ 18 years
- 27 177 3. Body weight 50 – 120 kg
- 28 178 4. Bio-ADM concentration > 70 pg/mL
- 29 179 5. Patient with early septic shock (start of vasopressor therapy < 12 hours)
- 30 180 6. Women of childbearing potential must have a negative serum or urine pregnancy test before randomization
- 31 181 and have to use a highly effective method of contraception

32 182  
33 183 **Exclusion criteria**

- 34 184 1. Moribund
- 35 185 2. Pre-existing unstable condition (e.g. a recent cerebral hemorrhage or infarct, a recent acute unstable
- 36 186 myocardial infarction (all < 3 months), congestive heart failure - New York Heart Association (NYHA) Class IV
- 37 187 3. Patients that required cardiopulmonary resuscitation in the last 4 weeks prior to evaluation for enrollment
- 38 188 4. Severe Chronic Obstructive Pulmonary Disease (COPD) with chronic oxygen need at home (GOLD IV)
- 39 189 5. Any organ or bone marrow transplant within the past 24 weeks
- 40 190 6. Uncontrolled serious hemorrhage (≥ 2 units of blood / platelets in the previous 24 hrs.). Patients may be
- 41 191 considered for enrollment if bleeding has stopped and patient is otherwise qualified
- 42 192 7. Uncontrolled hematological / oncological malignancies
- 43 193 8. Absolute neutropenia < 500 per  $\mu$ L
- 44 194 9. Severe chronic liver disease (Child-Pugh C)
- 45 195 10. Systemic fungal infection or active tuberculosis
- 46 196 11. Neuromuscular disorders that impact breathing / spontaneous ventilation
- 47 197 12. Burns > 30% of body surface
- 48 198 13. Plasmapheresis
- 49 199 14. Women who are pregnant or nursing
- 50 200 15. Participation in a clinical trial involving another investigational drug within 4 weeks prior to inclusion
- 51 201 16. Unwilling or unable to be fully evaluated for all follow-up visits

52 202  
53 203

54 204

55 205  
56  
57  
58  
59  
60

1  
2  
3 206 *Randomization*

4 207 Patients are randomly assigned to receive active treatment (2 mg/kg Adrecizumab, 4 mg/kg  
5  
6 208 Adrecizumab) or placebo, using a block randomization scheme (1:1:2 treatment allocation ratio). A  
7  
8 209 randomization code list will be generated by an independent statistician not involved in the study. For  
9  
10 210 each center, study medication is provided in boxes containing 4 pairs of vials according to the 4-block-  
11  
12 211 randomization list, allowing stratification by center.  
13  
14  
15

16 212  
17 213 *Informed consent*

18 214 Prior to any study-related procedures, patients must provide informed consent in accordance with the  
19  
20 215 EU Clinical Trial Directive, the Declaration of Helsinki and ICH-GCP requirements. For patients  
21  
22 216 unable to provide consent themselves due to their medical condition written informed consent is to be  
23  
24 217 obtained by the patient's legal representative or by other accepted procedures according to applicable  
25  
26 218 national law and local regulations, e.g. consent by relatives or family members. In addition,  
27  
28 219 retrospective patient consent to voluntarily continue the study will be obtained once the patient has  
29  
30 220 sufficiently recovered. Patient and/or the patient's legal representatives can withdraw their consent on  
31  
32 221 study participation at any time without providing an explanation.  
33  
34

35 222  
36 223 *Blinding*

37  
38 224 The study will be performed in a double-blinded fashion. All study personnel, including the  
39  
40 225 investigator and site staff, patients, monitors, sponsor and CRO staff will be blinded to treatment  
41  
42 226 assignment until study closure. The randomization list is kept strictly confidential and accessible only  
43  
44 227 to authorized persons who are not involved in the conduct of the study. In case of emergency, blinding  
45  
46 228 will only be broken if specific emergency treatment would be indicated by knowing the treatment  
47  
48 229 status of the patient. Specific emergency envelopes will be available at each site. The investigator is  
49  
50 230 required to notify the sponsor within 24 hours following the code break reporting the reason for  
51  
52 231 unblinding. The investigational drug and its matching placebo are indistinguishable and all study drug  
53  
54 232 kits will be packed in the same way. Unblinding will be authorised by the sponsor after completion of  
55  
56 233 the study, locking of the database and performance of a blinded data review.  
57  
58  
59  
60

1  
2  
3 234 *Study intervention*

4 235 A single dose of the study drug (2 or 4 mg/kg Adrecizumab, or placebo) is administered over a 1 hour  
5  
6 236 period by continuous intravenous infusion, as soon as possible, but at the latest, within 12 hours  
7  
8 237 following start of vasopressor therapy. Study drug is administered separately from any concomitant  
9  
10 238 drugs using a dedicated lumen of a central venous catheter or a separate peripheral line. Study  
11  
12 239 medication is provided in boxes according to the 4-block-randomization list. Each box contains 4 pairs  
13  
14 240 of vials for a 1:1:2 treatment allocation ratio. The following pairs of vials are supplied in the box, in a  
15  
16 241 blinded fashion: a set of 2 vials of Adrecizumab (for reconstitution of the 4 mg/kg dose), a set of 1 vial  
17  
18 242 of Adrecizumab and 1 vial of placebo (for reconstitution of the 2 mg/kg dose) and two sets of two  
19  
20 243 placebo vials. All vials are indistinguishable from each other, containing the same volume of solution,  
21  
22 244 the same aqueous buffer and identical packaging. The study drug, adjusted to the patient's body  
23  
24 245 weight, has to be reconstituted from a pair of vials. All study drug are stored in a secure and  
25  
26 246 adequately temperature-monitored pharmacy storage facility at 2 – 8°C.

27  
28  
29 247

30 248 *Concomitant medication*

31  
32 249 There are no specific restrictions regarding use of concomitant medication or other therapies. All  
33  
34 250 patients will be treated according to “International Guidelines for Management of Severe Sepsis and  
35  
36 251 Septic Shock”.<sup>27</sup> All concomitant medical treatments and medication will be recorded from inclusion  
37  
38 252 until day 28 or ICU discharge (whichever comes first).

39  
40 253

41  
42 254 *Patient and public involvement*

43  
44 255 Patients and the public were not involved in elaboration of the study protocol. There is no plan to  
45  
46 256 disseminate the results directly to the study participants. Results will be published in a peer-reviewed  
47  
48 257 journal and presented on conferences.

49  
50 258

51  
52 259 **Statistical and analytical plan**

53  
54 260 *Sample size calculations*

1  
2  
3 261 The sample size was calculated for the primary efficacy endpoint (SSI up to day 14). A sample size of  
4  
5 262 n=150 patients is planned for the combined treatment groups receiving 2 and 4 mg/kg Adrecizumab.  
6  
7 263 As both dosages result in an excess of antibody over the target peptide ADM, no difference in  
8  
9 264 treatment effect is expected between the dosage groups. Therefore, the two dosage groups are pooled  
10  
11 265 together for the final analysis, unless either dose is insufficient or safety and tolerability analysis  
12  
13 266 indicate that one dose is not safe or tolerable. Power calculation was based on simulation analyses.  
14  
15 267 The distribution of the SSI was based on real patient data from the ALBIOS study (n=539)<sup>15</sup> and  
16  
17 268 underlying assumptions were re-evaluated using results from the AdrenOSS-1 observational study.<sup>18</sup>  
18  
19 269 For the simulations, a sample size of n=150 per group (treatment or placebo), and an effect size of  
20  
21 270 10% decrease in SSI in the treatment group resulted in a power of the study of more than 80% to  
22  
23 271 demonstrate an improvement of SSI of > 0 with at least 80% probability.  
24  
25 272

273

### 273 *Statistical analyses*

274 Continuous variables will be summarized by the number of patients, mean, SD or median, quartile and  
275 range, as appropriate. Categorical variables will be summarized using number and percentage by  
276 category. Demographic and medical background data, secondary endpoints and safety variables will  
277 be analyzed by means of descriptive and exploratory methods.

278 The primary analysis for efficacy will be performed as an intention-to-treat analysis based on the  
279 combined dosage groups of Adrecizumab (n=150 patients total) versus placebo. A secondary analysis  
280 will compare the two doses for differences in efficacy. In case patients did not receive the treatment  
281 they were randomized to, an analysis based on the actual treatment will also be performed (as-treated-  
282 analysis). For efficacy, a first analysis will determine whether the improvement in SSI due to  
283 treatment is > 0 with at least 80% probability. Only if this is achieved, the classical p-value using  
284 appropriate methods will be calculated. The primary efficacy endpoint, 14-day SSI, will be analyzed  
285 using the non-parametric Wilcoxon test, to estimate the treatment effects (based on the ‘pseudo-  
286 median’) as well as its confidence interval. All-cause mortality will be evaluated using Kaplan-Meier  
287 plots comparing treatment versus placebo (log-rank test) and Cox regression modelling including  
288 covariates to adjust for potential confounders. In order to identify subgroups which may possibly

1  
2  
3 289 benefit more from Adrecizumab treatment, interactions with other drugs, as well as exploratory  
4  
5 290 subgroup analyses are planned in patients defined by disease severity, biomarkers, concomitant  
6  
7 291 medication or other clinical data.

8  
9 292

10  
11 293 *Interim analysis with futility stop*

12  
13 294 An unblinded interim analysis is planned after 50% of patients completed the study on day 28. The  
14  
15 295 study will be terminated if the probability of a positive outcome after recruitment of all patients is  
16  
17 296 below 40%, based on the primary efficacy endpoint 14 day SSI. In case the futility stop is reached, but  
18  
19 297 if some of the other efficacy endpoints show a promising outcome for the full study, the futility stop  
20  
21 298 may be suspended. Statistical consequence of applying the futility analysis was included in the power  
22  
23 299 simulation.

24  
25 300

26  
27 301 **Data quality assurance**

28  
29 302 All data management activities are done according to ICH-GCP as required by regulatory agencies. A  
30  
31 303 commercial Contract Research Organisation (CRO), M.A.R.C.O. GmbH & Co. KG (M.A.R.C.O.<sup>®</sup>),  
32  
33 304 will be responsible for data management. All sites will maintain source documentation and enter  
34  
35 305 patient data into an electronic case report form (eCRF). Automated and manual checks will be  
36  
37 306 performed to ensure completeness and consistency of the data. The eCRF was designed by  
38  
39 307 M.A.R.C.O.<sup>®</sup> in the Amedon system. Validation checks are implemented in the system or programmed  
40  
41 308 with SAS<sup>®</sup>, version 9.1 or higher, according to the data validation plan set up by M.A.R.C.O.<sup>®</sup>.

42  
43 309

44  
45 310 **Safety assessments**

46  
47 311 *Medication error*

48  
49 312 Adequately trained hospital staff will prepare, double-check and administer study medication. The  
50  
51 313 dose levels that are administered in the study have not caused any safety concerns in previous studies  
52  
53 314 in healthy volunteers<sup>22-24</sup> or in preclinical safety and toxicological studies in animals and non-human  
54  
55 315 primates. The risk for adverse health effects due to medication errors are thought to be minimal.

56  
57 316

1  
2  
3 317 *Overdose risks*

4 318 No drug specific antidote for Adrecizumab is available. An overdose is defined as any dose higher  
5  
6 319 than the assigned treatment dose. However, if by accident, the maximum volume would be withdrawn  
7  
8 320 from a pair of Adrecizumab vials during preparation of study medication, this would not exceed the  
9  
10 321 tested maximum dose of 8 mg/kg Adrecizumab in healthy volunteers, which did not result in any  
11  
12 322 safety concerns.<sup>22-24</sup>

13  
14 323

15  
16 324 *AE reporting*

17  
18 325 All patients are monitored for adverse events (AEs). AEs are defined as any untoward medical  
19  
20 326 occurrence in a patient administered a product and which does not necessarily have a causal  
21  
22 327 relationship with this treatment. Investigators must document all AEs (whether serious or non-serious  
23  
24 328 and judged related or unrelated to the study drug) that occur during the study period extending from  
25  
26 329 day 1 (inclusion) until 90 days after study drug administration in the eCRF. If the AE is serious, a  
27  
28 330 ‘serious adverse event report form’ must also be sent to the safety contact of the sponsor (spm<sup>2</sup>, Safety  
29  
30 331 Projects & more GmbH, Hirschberg an der Bergstraße, Germany) within 24 hours of becoming aware  
31  
32 332 of the SAE. The severity of the AE will be rated as “mild”, “moderate”, “severe”, “life-threatening”,  
33  
34 333 “disabling” or “death related to event”. Investigators will use medical judgement to determine whether  
35  
36 334 there is evidence for a causal relationship and will describe this causality using terms such as  
37  
38 335 “certain”, “probably/likely”, “possible”, “unlikely” or “unrelated”. All AEs will be followed-up until  
39  
40 336 they have abated, or until a stable situation has been reached, and will be reported as such.

41  
42 337

43  
44 338 *External data monitoring committee*

45  
46 339 An independent DSMB has been established to monthly review safety data including SAEs and,  
47  
48 340 overall safety data, and will judge the relevance of events for patient safety. DSMB members will have  
49  
50 341 no direct relationship to the study or to the study sponsor. The DSMB, composed by two clinical  
51  
52 342 experts in the field of sepsis, a biostatistician and a pharmacovigilance representative, will operate  
53  
54 343 independently. The DSMB is empowered to recommend changes in the design of the study to ensure  
55  
56 344 the safety of the patients and scientific integrity of the study.

1  
2  
3 345 **Withdrawal**

4 346 Participation is strictly voluntary and a patient or their legal representative may withdraw the patient  
5  
6 347 from the study at any time without providing an explanation. This will not affect his/her right for  
7  
8 348 future medical care. If a patient would withdraw from the study, the date, circumstances and any  
9  
10 349 reason provided will be documented on the withdrawal page of the eCRF. No data obtained after  
11  
12 350 withdrawal of consent will be recorded on eCRFs - with the exception of any case of death until 90  
13  
14 351 days for safety reasons - nor will they be evaluated as part of the study, unless the patient gives  
15  
16 352 specific permission.  
17

18 353

19  
20 354 **Study period**

21  
22 355 The study started enrolling patients in December 2017. The estimated study enrolment completion  
23  
24 356 date is anticipated in the first half of 2019. Please note that this manuscript was finalized prior to the  
25  
26 357 interim analysis.  
27

28 358

29  
30 359 **Ethics and dissemination**

31  
32 360 *Ethics*

33  
34 361 The study was started after approval of the study protocol and all other relevant study documents by  
35  
36 362 the relevant institutional review boards / independent ethics committees. The study is performed in  
37  
38 363 accordance with the Declaration of Helsinki, ICH, Code of Federal regulations and all other applicable  
39  
40 364 regulations. Collection of personal data is performed according to country-specific regulations.  
41

42 365

43  
44 366 *Confidentiality*

45  
46 367 After written informed consent has been obtained, patients will be assigned a unique 6-digit patient  
47  
48 368 identification number. This allows identification of patients, while maintaining patient confidentiality.  
49  
50 369 Confidentiality of all patient identities will be maintained, except during source data verification when  
51  
52 370 monitors, auditors and other authorized agents of the sponsor or its designee, the ethics committee or  
53  
54 371 any other applicable regulatory authorities are granted direct access to the study patient's original  
55  
56 372 medical records. No material bearing a patient's name will be kept on file by the CRO or Sponsor.  
57

1  
2  
3 373 *Study monitoring*

4 374 The study is monitored by a clinical monitor, who will visit the investigator and study sites at periodic  
5  
6 375 intervals in addition to phone, letter and e-mail contact. The monitor will follow the study closely  
7  
8 376 through reviewing of study records and source documents, and will discuss the conduct of the study  
9  
10 377 with the investigator and other site personnel.

11  
12 378

13  
14 379 *Dissemination policy*

15  
16 380 The data of the study will be reported at scientific meetings and published in a peer-reviewed scientific  
17  
18 381 journal, regardless of the results on outcome.

19  
20 382

21  
22 383

23  
24 384

25  
26 385

27  
28 386  
29  
30  
31  
32  
33  
34  
35  
36  
37  
38  
39  
40  
41  
42  
43  
44  
45  
46  
47  
48  
49  
50  
51  
52  
53  
54  
55  
56  
57  
58  
59  
60



1  
2  
3 387 **Discussion**

4 388 The development of new therapies for the treatment of sepsis and septic shock has proven to be a  
5  
6 389 challenging task over the last decades. Many trials have investigated potential adjunctive therapies,  
7  
8 390 predominantly focussing on anti-inflammatory agents. Unfortunately, this enormous effort put into  
9  
10 391 dozens of clinical trials has not yielded compounds with clinically relevant beneficial effects. This can  
11  
12 392 be explained by many factors, such as heterogeneous study populations and difficulties in selecting  
13  
14 393 patients who may best benefit from an intervention. Also, the timing of the intervention, inappropriate  
15  
16 394 outcome measures and the complexity of the disease with multiple pathways of injury hamper clinical  
17  
18 395 research in sepsis patients.<sup>5 28</sup>

19  
20 396 Importantly, when antibodies were used, most interventions were based on complete neutralization of  
21  
22 397 the target. However, physiology probably is more balanced as some targets can exert both beneficial  
23  
24 398 and detrimental effects, often even simultaneously. This may also represent a major contributing factor  
25  
26 399 to the failure of many therapies to improve outcome witnessed in the last decades. Along these lines, it  
27  
28 400 might be argued that a partially neutralizing therapy is more effective than total neutralization. The  
29  
30 401 AdrenOSS-2 trial is an innovative, biomarker driven trial with a novel, supposedly clinically relevant  
31  
32 402 efficacy endpoint.

33  
34 403

35  
36 404 Patient heterogeneity is a substantial contributor to the difficulties in identifying effective therapies for  
37  
38 405 sepsis. Patient selection is innovative in this study for two reasons. First, a more homogeneous  
39  
40 406 subgroup of sepsis patients is selected, based on the combination of presence of early signs of shock,  
41  
42 407 i.e. requiring vasopressor support, as well as elevated concentration of the biomarker bio-ADM.  
43  
44 408 Selecting patients in the early phase of septic shock should select patients with preventable organ  
45  
46 409 dysfunction compared to patients for whom septic shock and need of vasopressors lasted more than 12  
47  
48 410 hours. Furthermore, as previously described, measuring bio-ADM at baseline correlates strongly with  
49  
50 411 the need for organ supporting therapy and mortality.<sup>14 15 17 18</sup> Therefore, including bio-ADM as an  
51  
52 412 inclusion criteria likely allows for better selection of patients who not only need vasopressor but also  
53  
54 413 with a poor outcome. Combining need of vasopressor and high bio-ADM may contribute to obtaining

1  
2  
3 414 a more homogeneous population of patients whom may benefit most from this adjunctive sepsis  
4 415 therapy. To our knowledge, this is one of the first precision medicine study in sepsis patients.<sup>29</sup>

6 416

8 417 ADM is a key vasoactive peptide involved in several important pathways in sepsis, which makes it an  
9 418 attractive therapeutic target in sepsis.<sup>10</sup> It has previously been described as a double-edged sword in  
10 419 sepsis.<sup>30</sup> On vascular smooth muscle cells, ADM exerts vasodilatory effects and thereby induces  
11 420 vasodilation and hypotension.<sup>11-13</sup> This effect of interstitial ADM may exacerbate the severity of shock  
12 421 and may lead to organ hypoperfusion and organ dysfunction. In contrast, ADM present in the  
13 422 circulation exerts potent endothelial barrier stabilizing effects, reducing vascular leakage that may  
14 423 improve survival, as was demonstrated in *in vitro*<sup>6 7 31 32</sup> and *in vivo* in animal models of sepsis and  
15 424 systemic inflammation.<sup>8 9 33 34</sup> However, direct administration of ADM during sepsis poses several  
16 425 limitations. Because of a short half-life,<sup>11</sup> continuous infusion of ADM would be required. In addition,  
17 426 due to ADM's potent vasodilative effects, ADM-induced hypotension might be an issue, which might  
18 427 further aggravate shock in septic patients. A non-neutralizing antibody might attenuate ADM's  
19 428 vasodilatory effects on VSMCs and potentiate ADM's effects on endothelial cells.

21 429

22 430 Adrecizumab, a *non-neutralizing* ADM-binding antibody, is one of the first therapies specifically  
23 431 aimed at improving vascular endothelial barrier function, and represents a new candidate drug for the  
24 432 treatment of septic shock. A detailed description of Adrecizumab's supposed mode of action is  
25 433 described elsewhere.<sup>35</sup> Briefly, during sepsis, increased concentrations of ADM in the interstitial  
26 434 compartment are thought to contribute to hypotension. Adrecizumab, which is confined to the blood  
27 435 compartment, shifts the distribution of ADM away from the interstitium towards the blood, by  
28 436 preventing diffusion of bound ADM.<sup>35</sup> This results in a strong increase of (bound) ADM  
29 437 concentrations in the blood,<sup>22 23 24</sup> where it, being bound to a non-neutralizing antibody, interacts with  
30 438 receptors on endothelial cells and reduces vascular leakage and tissue edema. At the same time,  
31 439 concentrations in the interstitium are reduced through this mechanism, leading to less vasodilation and  
32 440 subsequent hypotension. This increase in plasma ADM concentration was observed in a rapid and  
33 441 dose dependent manner upon i.v. administration of Adrecizumab, both in animals and in humans.<sup>21-24</sup>

1  
2  
3 442 Through reducing vascular leakage, tissue edema and hypotension, Adrecizumab could increase tissue  
4 443 perfusion and improve the prognosis of sepsis patients, whereas it might also reduce the use of  
5 444 vasopressors, thereby limiting potential adverse effects of vasopressors.<sup>36,37</sup>

6  
7  
8 445 Adrecizumab, administered as a single intravenous dose (due to its long half-life of 14 days), showed  
9 446 promising results in preclinical studies of systemic inflammation and septic shock, including  
10 447 attenuation of vascular leakage, lower vasopressor infusion rates and less organ dysfunction, related to  
11 448 improved survival.<sup>19-21</sup>

12  
13  
14  
15  
16 449  
17  
18 450 Substantial effort has been directed at reducing mortality in sepsis patients. Nevertheless, all major  
19 451 sepsis trials have failed to improve survival. Although survival is a clear and relevant end-point, it may  
20 452 be too insensitive to demonstrate a beneficial effect of a novel intervention. Therefore, novel endpoints  
21 453 beyond all-cause mortality should be considered.<sup>38</sup> A composite endpoint, the “Sepsis Support Index”  
22 454 (SSI), is used in the present study as the primary efficacy endpoint. The SSI is a composite index  
23 455 reflecting days on organ supportive therapy (hemodynamics, pulmonary), days with organ dysfunction  
24 456 (renal), as well as all-cause mortality. These organ systems were improved by Adrecizumab  
25 457 administration in preclinical models, and support of these organ systems defines ICU care, indicating  
26 458 that a therapeutic effect is of clinical relevance. The SSI is thought to allow for earlier and more  
27 459 sensitive observations of possible clinically relevant beneficial effects of Adrecizumab compared to  
28 460 more traditional primary efficacy endpoints.

29  
30  
31  
32 461  
33  
34 462 Potential limitations of the study include strict in- and exclusion criteria and a short window for patient  
35 463 inclusion (within 12 hours following vasopressor therapy). These limitations result in a more  
36 464 homogenous study population, but they may make recruitment more difficult and limit the  
37 465 generalizability of the results.

38  
39  
40 466  
41  
42 467 In conclusion, despite the exponential increase of knowledge gathered in the last decades pertaining  
43 468 the pathophysiology of septic shock, this has not translated to effective therapeutic interventions and  
44 469 as a consequence, this condition remains to have an unacceptable high morbidity and mortality. The

1  
2  
3 470 AdrenOSS-2 trial is one of the first personalized medicine trial in septic shock patients, aimed at  
4  
5 471 characterizing the safety and efficacy of the ADM-binding antibody Adrecizumab in septic shock  
6  
7 472 patients with elevated concentrations of bio-ADM. The trial incorporates a number of innovative  
8  
9 473 features such as biomarker guided patient selection and a novel efficacy endpoint in its design to avoid  
10  
11 474 pitfalls of previous sepsis trials. Adrecizumab represents a promising approach to treat this lethal  
12  
13 475 syndrome. The results of this proof-of-concept and dose-finding phase II trial are eagerly awaited, and  
14  
15 476 will importantly aid the design of future trials with this drug.

16  
17 477

### 18 478 **Acknowledgements**

19  
20 479 The authors thank the staff and patients participating in the study. In addition, the authors would like  
21  
22 480 to thank Joachim Struck for critically reviewing the manuscript.

23  
24 481

### 25 26 482 **Contributors**

27  
28 483 CG and AB drafted the manuscript. The manuscript was critically reviewed by MK, OH, PS, JZ, GM,  
29  
30 484 PFL, AM and PP. All authors read and approved the final manuscript for publication.

31  
32 485

### 33 34 486 **Funding**

35  
36 487 This work was supported by Adrenomed AG.

37  
38 488

### 39 40 489 **Competing interests**

41  
42 490 C. Geven and A. Blet received travel reimbursements from Adrenomed AG. M. Kox declares to have  
43  
44 491 no competing interests. O. Hartmann, P. Scigalla and J. Zimmerman are employed by Adrenomed AG.  
45  
46 492 G. Marx received travel reimbursements and consultancy fees from Adrenomed AG. PF. Laterre  
47  
48 493 received travel reimbursements and consultancy fees from Adrenomed AG A. Mebazaa received travel  
49  
50 494 reimbursements from Adrenomed AG. UMR-S 942 Inserm received a research grant from Adrenomed  
51  
52 495 AG. P. Pickkers received travel reimbursements and consultancy fees from Adrenomed AG. P.  
53  
54 496 Pickkers's institution received a research grant from Adrenomed AG. Adrenomed AG reviewed this  
55  
56 497 manuscript. Adrenomed AG holds patent rights on anti-ADM antibodies.

498 **References**

- 499 1. Gaieski DF, Edwards JM, Kallan MJ, et al. Benchmarking the incidence and mortality of  
500 severe  
501 sepsis in the United States. *Critical Care Med* 2013;41:1167-74. doi:  
502 10.1097/CCM.0b013e31827c09f8 [published Online First: 28 February 2013]
- 503 2. Fleischmann C, Scherag A, Adhikari NK, et al. Assessment of Global Incidence and Mortality  
504 of Hospital-treated Sepsis. Current Estimates and Limitations. *Am J Respir Crit Care Med*  
505 2016;193:259-72. doi: 10.1164/rccm.201504-0781OC [published Online First: 29 September  
506 2015]
- 507 3. Vincent JL, Marshall JC, Namendys-Silva SA, et al. Assessment of the worldwide burden of  
508 critical illness: the intensive care over nations (ICON) audit. *Lancet Respir Med* 2014;2:380-6.  
509 doi: 10.1016/s2213-2600(14)70061-x [published Online First: 18 April 2014]
- 510 4. Singer M, Deutschman CS, Seymour CW, et al. The Third International Consensus  
511 Definitions for Sepsis and Septic Shock (Sepsis-3). *JAMA* 2016;315:801-10. doi:  
512 10.1001/jama.2016.0287 [published Online First: 24 February 2016]
- 513 5. Gotts JE, Matthay MA. Sepsis: pathophysiology and clinical management. *BMJ*  
514 2016;353:i1585. doi: 10.1136/bmj.i1585 [published Online First: 25 May 2016]
- 515 6. Hippenstiel S, Witzenrath M, Schmeck B, et al. Adrenomedullin reduces endothelial  
516 hyperpermeability. *Circ Res* 2002;6:18-25.
- 517 7. Hocke AC, Temmesfeld-Wollbrueck B, Schmeck B, et al. Perturbation of endothelial junction  
518 proteins by *Staphylococcus aureus* alpha-toxin: inhibition of endothelial gap formation by  
519 adrenomedullin. *Histochem Cell Biol* 2006;126:305-16. doi: 10.1007/s00418-006-0174-5  
520 [published Online First: 6 April 2006]
- 521 8. Temmesfeld-Wollbrueck B, Brell B, David I, et al. Adrenomedullin reduces vascular  
522 hyperpermeability and improves survival in rat septic shock. *Intensive Care Med*  
523 2007;33:703-10. doi: 10.1007/s00134-007-0561-y [published Online First: 24 February 2007]
- 524 9. Muller-Redetzky HC, Will D, Hellwig K, et al. Mechanical ventilation drives pneumococcal  
525 pneumonia into lung injury and sepsis in mice: protection by adrenomedullin. *Crit Care*  
526 2014;18:R73. doi: 10.1186/cc13830 [published Online First: 16 April 2014]
- 527 10. Geven C, Kox M, Pickkers P. Adrenomedullin and Adrenomedullin-Targeted Therapy As  
528 Treatment Strategies Relevant for Sepsis. *Front Immunol* 2018;9:292. doi:  
529 10.3389/fimmu.2018.00292 [published Online First: 10 March 2018]
- 530 11. Meeran K, O'Shea D, Upton PD, et al. Circulating adrenomedullin does not regulate systemic  
531 blood pressure but increases plasma prolactin after intravenous infusion in humans: a  
532 pharmacokinetic study. *J Clin Endocrinol Metab* 1997;82:95-100. doi:  
533 10.1210/jcem.82.1.3656 [published Online First: 1 January 1997]
- 534 12. Lainchbury JG, Troughton RW, Lewis LK, et al. Hemodynamic, hormonal, and renal effects  
535 of short-term adrenomedullin infusion in healthy volunteers. *J Clin Endocrinol Metab*  
536 2000;85:1016-20. doi: 10.1210/jcem.85.3.6422 [published Online First: 17 March 2000]
- 537 13. Troughton RW, Lewis LK, Yandle TG, et al. Hemodynamic, hormone, and urinary effects of  
538 adrenomedullin infusion in essential hypertension. *Hypertension* 2000;36:588-93. [published  
539 Online First: 21 October 2000]
- 540 14. Marino R, Struck J, Maisel AS, et al. Plasma adrenomedullin is associated with short-term  
541 mortality and vasopressor requirement in patients admitted with sepsis. *Crit Care*  
542 2014;18:R34. doi: 10.1186/cc13731 [published Online First: 19 February 2014]
- 543 15. Caironi P, Latini R, Struck J, et al. Circulating biologically active adrenomedullin (bio-ADM)  
544 predicts hemodynamic support requirement and mortality during sepsis. *Chest* 2017 doi:  
545 10.1016/j.chest.2017.03.035 [published Online First: 16 April 2017]
- 546 16. Nishio K, Akai Y, Murao Y, et al. Increased plasma concentrations of adrenomedullin  
547 correlate with relaxation of vascular tone in patients with septic shock. *Crit Care Med*  
548 1997;25:953-7. [published Online First: 1 June 1997]
- 549 17. Blet A, et al. Bioactive adrenomedullin, organ support therapies and survival in the critically  
550 ill: Results from the FROG-ICU study. *Submitted* 2018.

- 1  
2  
3 551 18. Mebazaa A, et al. Circulating adrenomedullin estimates survival and reversibility of organ  
4 552 failure in sepsis: The prospective observational multinational Adrenomedullin and Outcome in  
5 553 Sepsis and Septic Shock (AdrenOSS) Study. *Submitted* 2018.
- 6 554 19. Struck J, Hein F, Karasch S, et al. Epitope specificity of anti-Adrenomedullin antibodies  
7 555 determines efficacy of mortality reduction in a cecal ligation and puncture mouse model.  
8 556 *Intensive Care Med Exp* 2013;1:22. doi: 10.1186/2197-425x-1-3 [published Online First: 1  
9 557 December 2013]
- 10 558 20. Wagner K, Wachter U, Vogt JA, et al. Adrenomedullin binding improves catecholamine  
11 559 responsiveness and kidney function in resuscitated murine septic shock. *Intensive Care Med  
12 560 Exp* 2013;1:21. doi: 10.1186/2197-425x-1-2 [published Online First: 1 December 2013]
- 13 561 21. Geven C, Peters E, Schroedter M, et al. Effects of the Humanized Anti-Adrenomedullin  
14 562 Antibody Adrecizumab (HAM8101) on Vascular Barrier Function and Survival in Rodent  
15 563 Models of Systemic Inflammation and Sepsis. *Shock* 2018. doi:  
16 564 10.1097/shk.0000000000001102 [published Online First: 13 January 2018]
- 17 565 22. Geven C, Kox M, Scigalla P, et al. Safety, tolerability and pharmacokinetics/-dynamics of the  
18 566 anti-adrenomedullin antibody Adrecizumab: a first in man study [Abstract]. *Intensive Care  
19 567 Med Exp* 2017;5(suppl 2).
- 20 568 23. Geven C, van Lier D, ten Elzen B, et al. The safety, tolerability and pharmacokinetics/-  
21 569 dynamics of the selective anti-adrenomedullin antibody Adrecizumab during experimental  
22 570 human endotoxemia [abstract]. *Neth J Crit Care* 2018;26:30-31.
- 23 571 24. Geven C, van Lier D, Blet A, et al. Safety, tolerability and pharmacokinetics/dynamics of the  
24 572 adrenomedullin antibody Adrecizumab in a first-in-human study and during experimental  
25 573 human endotoxemia in healthy subjects. *British Journal of Clinical Pharmacology* 2018: in  
26 574 press.
- 27 575 25. Weber J, Sachse J, Bergmann S, et al. Sandwich Immunoassay for Bioactive Plasma  
28 576 Adrenomedullin. *J Appl Lab Med* 2017;2:222-233.
- 29 577 26. Heyland DK, Muscedere J, Drover J, et al. Persistent organ dysfunction plus death: a novel,  
30 578 composite outcome measure for critical care trials. *Crit Care* 2011;15:R98. doi:  
31 579 10.1186/cc10110 [published Online First: 23 March 2011]
- 32 580 27. Rhodes A, Evans LE, Alhazzani W, et al. Surviving Sepsis Campaign: International Guidelines  
33 581 for Management of Sepsis and Septic Shock: 2016. *Intensive Care Med* 2017;43:304 – 377.  
34 582 doi: 10.1007/s00134-017-4683-6.
- 35 583 28. Fink MP, Warren HS. Strategies to improve drug development for sepsis. *Nat Rev Drug  
36 584 Discov* 2014;13:741-58. doi: 10.1038/nrd4368 [published Online First: 6 September 2014]
- 37 585 29. Pickkers P, Kox M. Towards precision medicine for sepsis patients. *Crit Care* 2017;21:11.  
38 586 doi: 10.1186/s13054-016-1583-z [published Online First: 13 January 2017]
- 39 587 30. Kox M, Pickkers P. Adrenomedullin: its double-edged sword during sepsis slices yet again.  
40 588 *Intensive Care Med Exp*, 2014:1-2.
- 41 589 31. Brell B, Temmesfeld-Wollbrück B, Altschner I, et al. Adrenomedullin reduces  
42 590 Staphylococcus aureus alpha-toxin-induced rat ileum microcirculatory damage. *Crit Care Med*  
43 591 2005;33:819-26. [published Online First: 9 April 2005]
- 44 592 32. Temmesfeld-Wollbrück B, Brell B, zu Dohna C, et al. Adrenomedullin reduces intestinal  
45 593 epithelial permeability in vivo and in vitro. *Am J Physiol Gastrointest Liver Physiol*  
46 594 2009;297:G43-51. doi: 10.1152/ajpgi.90532.2008 [published Online First: 9 May 2009]
- 47 595 33. Itoh T, Obata H, Murakami S, et al. Adrenomedullin ameliorates lipopolysaccharide-induced  
48 596 acute lung injury in rats. *Am J Physiol Lung Cell Mol Physiol* 2007;293:L446-52. doi:  
49 597 10.1152/ajplung.00412.2005 [published Online First: 15 June 2007]
- 50 598 34. Müller HC, Witzernath M, Tschernig T, et al. Adrenomedullin attenuates ventilator-induced  
51 599 lung injury in mice. *Thorax* 2010;65:1077-84. doi: 10.1136/thx.2010.135996 [published  
600 Online First: 26 October 2010]
- 52 601 35. Geven C, Bergmann A, Kox M, et al. Vascular Effects of Adrenomedullin and the Anti-  
53 602 Adrenomedullin Antibody Adrecizumab in Sepsis. *Shock* 2018. doi:  
54 603 10.1097/shk.0000000000001103 [published Online First: 13 January 2018]



- 1  
2  
3 604 36. Stolk RF, van der Poll T, Angus DC, et al. Potentially Inadvertent Immunomodulation:  
4 605 Norepinephrine Use in Sepsis. *Am J Respir Crit Care Med* 2016;19:550-8. doi:  
5 606 10.1164/rccm.201604-0862CP [published Online First: 12 July 2016]  
6 607 37. Dunser MW, Hasibeder WR. Sympathetic overstimulation during critical illness: adverse  
7 608 effects of adrenergic stress. *J Intensive Care Med* 2009;24:293-316. doi:  
8 609 10.1177/0885066609340519 [published Online First: 26 August 2009]  
9 610 38. Mebazaa A, Laterre PF, Russell JA, et al. Designing phase 3 sepsis trials: application of  
10 611 learned experiences from critical care trials in acute heart failure. *J Intensive Care* 2016;4:24.  
11 612 doi: 10.1186/s40560-016-0151-6 [published Online First: 2 April 2016]  
12 613  
13 614  
14  
15  
16  
17  
18  
19  
20  
21  
22  
23  
24  
25  
26  
27  
28  
29  
30  
31  
32  
33  
34  
35  
36  
37  
38  
39  
40  
41  
42  
43  
44  
45  
46  
47  
48  
49  
50  
51  
52  
53  
54  
55  
56  
57  
58  
59  
60

For peer review only

1  
2  
3 615 **Figure and table legends**  
4  
5 616  
6  
7 617 **Figure 1.** Study design.  
8  
9 618  
10  
11 619 **Figure 2.** Study timeline.  
12  
13 620  
14  
15 621 **Figure 3.** Primary *efficacy* endpoint: 14-day Sepsis Support Index (SSI): example calculation.  
16  
17 622  
18  
19 623 **Table 1.** In- and exclusion criteria.  
20  
21  
22  
23  
24  
25  
26  
27  
28  
29  
30  
31  
32  
33  
34  
35  
36  
37  
38  
39  
40  
41  
42  
43  
44  
45  
46  
47  
48  
49  
50  
51  
52  
53  
54  
55  
56  
57  
58  
59  
60



Screening

BMJ Open **Patients with**  
Early (<12hr) septic shock and  
Bio-ADM > 70 pg/mL

Randomisation

1

:

1

:

2

Treatment

2 mg/kg  
Adrecizumab

4 mg/kg  
Adrecizumab

Placebo

n=150 patients  
completed day 28

Analyses

**Interim analysis for futility**  
Stop of study if probability of  
positive outcome of efficacy  
endpoint is < 40%

n=300 patients  
completed follow-up

Objectives/endpoints

**Final analysis**

**Primary objective**

- *Safety and tolerability* of Adrecizumab

**Secondary objectives**

- *Efficacy* of Adrecizumab (intention-to-treat analysis)
  - Primary efficacy endpoint: Sepsis Support Index (SSI) within the first 14 days.
  - Other endpoints include: mortality, morbidity, vital signs, QoL and length of stay.
- *Pharmacokinetics* ( $C_{max}$ , AUC, V, CL,  $t_{1/2}$ )

**BMJ Open Follow-up**  
Safety and tolerability for 90 days

- Criteria for early septic shock
- Start vasopressor

**Daily assessments**

(S)AEs, concomitant therapy, organ dysfunction, disease severity scores, clinical, pharmacological and biological parameters, blood sampling at day 1, 3, 5 and 7 after randomization

Time

Day<sub>1</sub>

Day<sub>28</sub>

Day<sub>90</sub>

**12 hour window for**

- Contact CCC for randomization and to confirm:
  - Informed consent
  - Bio-ADM determination (must be > 70 pg/ml)
  - in-/exclusion criteria
- Study drug infusion (i.v. over 1-hour period)

Quality of life  
questionnaire

Quality of life  
questionnaire

**Sepsis Support Index (SSI)**

Sepsis Support Index (SSI), max. 1 point per day:

- Day on vasopressor support, or
  - Day on mechanical ventilation, or
  - Day with renal SOFA = 4, or
  - Days not alive
- } = 1 point

*Example calculation of daily and cumulative Sepsis Support Index score*

**Patient enrolled**

1  
2  
3  
4  
5  
6  
7  
8  
9  
10  
11  
12  
13  
14  
15  
16  
17  
18  
19  
20

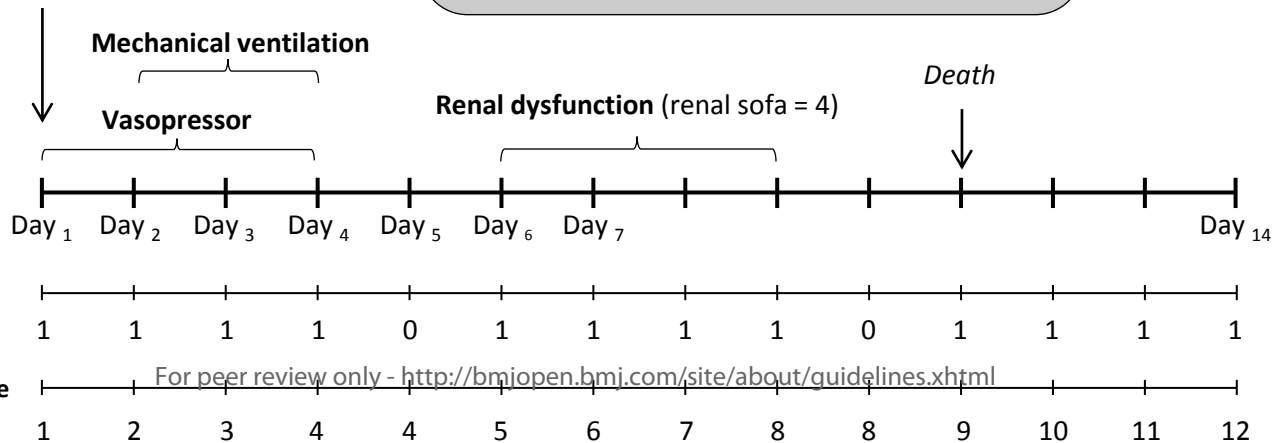

# BMJ Open

**Study protocol: A Double Blind, Placebo-Controlled, Randomized, Multicenter, Proof of Concept and Dose-finding Phase II Clinical Trial to Investigate the Safety, Tolerability and Efficacy of Adrecizumab in Patients with Septic Shock and Elevated Adrenomedullin concentration (AdrenOSS-2)**

|                                 |                                                                                                                                                                                                                                                                                                                                                                                                                                                                                                                                                                                                                                                                                                                                                                   |
|---------------------------------|-------------------------------------------------------------------------------------------------------------------------------------------------------------------------------------------------------------------------------------------------------------------------------------------------------------------------------------------------------------------------------------------------------------------------------------------------------------------------------------------------------------------------------------------------------------------------------------------------------------------------------------------------------------------------------------------------------------------------------------------------------------------|
| Journal:                        | <i>BMJ Open</i>                                                                                                                                                                                                                                                                                                                                                                                                                                                                                                                                                                                                                                                                                                                                                   |
| Manuscript ID                   | bmjopen-2018-024475.R1                                                                                                                                                                                                                                                                                                                                                                                                                                                                                                                                                                                                                                                                                                                                            |
| Article Type:                   | Protocol                                                                                                                                                                                                                                                                                                                                                                                                                                                                                                                                                                                                                                                                                                                                                          |
| Date Submitted by the Author:   | 14-Sep-2018                                                                                                                                                                                                                                                                                                                                                                                                                                                                                                                                                                                                                                                                                                                                                       |
| Complete List of Authors:       | Geven, Christopher; Radboudumc, Intensive Care Medicine<br>Blet, Alice; University Hospitals Saint-Louis – Lariboisière, Department of Anesthesia, Burn and Critical Care; Inserm, UMR-S 942<br>Kox, Matthijs; Radboud University Medical Centre, Intensive Care Medicine<br>Hartmann, Oliver; Adrenomed AG<br>Scigalla, Paul; Adrenomed AG<br>Zimmermann, Jens; Adrenomed AG<br>Marx, Gernot; University of Aachen, Department Intensive Care Medicine<br>Laterre, Pierre-François; Cliniques Universitaires Saint-Luc, Department of Critical Care Medicine<br>Mebazaa, Alexandre; University Hospitals Saint-Louis – Lariboisière, Department of Anesthesia, Burn and Critical Care; Inserm, UMR-S 942<br>Pickkers, Peter; Radboudumc, Intensive Care Medicine |
| <b>Primary Subject Heading</b>: | Intensive care                                                                                                                                                                                                                                                                                                                                                                                                                                                                                                                                                                                                                                                                                                                                                    |
| Secondary Subject Heading:      | Pharmacology and therapeutics                                                                                                                                                                                                                                                                                                                                                                                                                                                                                                                                                                                                                                                                                                                                     |
| Keywords:                       | Sepsis, Adrecizumab, Adrenomedullin, Septic shock, Vascular integrity, Phase II clinical trial                                                                                                                                                                                                                                                                                                                                                                                                                                                                                                                                                                                                                                                                    |
|                                 |                                                                                                                                                                                                                                                                                                                                                                                                                                                                                                                                                                                                                                                                                                                                                                   |

SCHOLARONE™  
Manuscripts

1  
2  
3 1  
4  
5 2  
6  
7 3  
8  
9 4  
10  
11 5  
12  
13 6  
14  
15 7  
16  
17 8  
18  
19 9  
20  
21 10  
22  
23 11  
24  
25 12  
26  
27 13  
28  
29 14  
30  
31 15  
32  
33 16  
34  
35 17  
36  
37 18  
38  
39 19  
40  
41 20  
42  
43 21  
44  
45 22  
46  
47 23  
48  
49 24  
50  
51 25  
52  
53 26  
54  
55 27  
56  
57 28  
58  
59 29  
60

**Study protocol: A Double Blind, Placebo-Controlled, Randomized, Multicenter, Proof of Concept and Dose-finding Phase II Clinical Trial to Investigate the Safety, Tolerability and Efficacy of Adrecizumab in Patients with Septic Shock and Elevated Adrenomedullin concentration (AdrenOSS-2)**

**Authors**

Christopher Geven<sup>1\*</sup>, Alice Blet<sup>2\*</sup>, Matthijs Kox<sup>1</sup>, Oliver Hartmann<sup>3</sup>, Paul Scigalla<sup>3</sup>, Jens Zimmermann<sup>3</sup>, Gernot Marx<sup>4\*</sup>, Pierre-Francois Laterre<sup>5\*</sup>, Alexandre Mebazaa<sup>2\*</sup>, Peter Pickkers<sup>1\*</sup>

<sup>1</sup>Department of Intensive Care Medicine, Radboud Center for Infectious Diseases (RCI), Radboud university medical center, HP: 710, PO Box 9101, 6500 HB Nijmegen, The Netherlands.

<sup>2</sup>Department of Anesthesia, Burn and Critical Care, University Hospitals Saint-Louis – Lariboisière, AP-HP, Paris, France. UMR-S 942, Inserm, Paris, France. Paris Diderot University, Sorbonne Paris Cité, Paris, France.

<sup>3</sup>Adrenomed AG, Neuendorfstraße 15A, D-16761 Hennigsdorf, Germany.

<sup>4</sup>Department of Intensive Care Medicine and Intermediate Care, RWTH University Hospital Aachen, Aachen, Germany.

<sup>5</sup>Department of Critical Care Medicine, Cliniques Universitaires Saint-Luc, Université Catholique de Louvain (UCL), Brussels, Belgium.

\* Christopher Geven and Alice Blet contributed equally to the manuscript.

\* Pierre-Francois Laterre, Gernot Marx, Alexandre Mebazaa and Peter Pickkers share senior authorship as steering committee members of the AdrenOSS-2 trial.

**Corresponding author:** Prof. Dr. Peter Pickkers. Radboud university medical center, Department of Intensive Care Medicine (710), PO Box 9101, 6500 HB, Nijmegen, The Netherlands. E-mail: [peter.pickkers@radboudumc.nl](mailto:peter.pickkers@radboudumc.nl)

1  
2  
3 30 **Word Counts:**

4 31 **Abstract:** 299      **Text:** 5780 (excluding abstract, table and references)  
5  
6  
7 32

8 33 **Keywords:** Adrenomedullin; Adrecizumab; sepsis; septic shock; endothelium; vascular integrity;  
9  
10 34 antibody; phase II.  
11  
12  
13 35

14 36 **Abstract**

15  
16 37 **Introduction:** Sepsis remains a major health problem with an increasing incidence, high morbidity  
17  
18 38 and high mortality. Apart from treatment with antibiotics and organ support, no approved specific  
19  
20 39 adjunct therapies currently exist. Adrenomedullin (ADM) is a vasoactive peptide. High plasma  
21  
22 40 concentrations of ADM correlate with worse outcome in sepsis patients. Preclinical work with the  
23  
24 41 non-neutralizing ADM-binding antibody Adrecizumab showed promising effects in animal models of  
25  
26 42 septic shock, including improved vascular barrier function, reduced vasopressor demand and organ  
27  
28 43 dysfunction, and increased survival. Therapeutic use of Adrecizumab may therefore improve outcome  
29  
30 44 in critically ill patients with septic shock and high ADM plasma concentrations. Phase I studies in  
31  
32 45 healthy volunteers did not reveal any safety concerns. In this biomarker-guided trial, the safety and  
33  
34 46 efficacy of Adrecizumab will be investigated in patients with septic shock.  
35

36 47 **Methods and analysis:** We describe a phase II, randomized, double blind, placebo-controlled,  
37  
38 48 biomarker-guided, proof of concept and dose-finding clinical trial in patients with early septic shock  
39  
40 49 and high concentration of circulating ADM. A total of 300 patients will be enrolled at approx. 30 sites  
41  
42 50 within the European Union. Patients are randomized to receive active treatment (2 and 4 mg/kg  
43  
44 51 Adrecizumab) or placebo, in a 1:1:2 ratio. Patient selection is not only guided by clinical parameters,  
45  
46 52 but also biomarker-guided by measurement of circulating biologically active ADM concentration at  
47  
48 53 admission. Primary endpoint is safety and tolerability of Adrecizumab over a 90 day period. A key  
49  
50 54 secondary endpoint is the Sepsis Severity Index (SSI) over a 14-day period.  
51

52 55 **Ethics and dissemination:** This study is approved by relevant institutional review boards/independent  
53  
54 56 ethics committees and is conducted in accordance with the ethical principles of the Declaration of  
55  
56  
57  
58  
59  
60

1  
2  
3 57 Helsinki, the European Medicines Agency guidelines of Good Clinical Practice, and all other  
4 58 applicable regulations. Results of this study will be published in a peer-reviewed scientific journal.  
5  
6  
7 59

8  
9 60 **ClinicalTrial.gov registration number:** NCT03085758  
10  
11 61

12 62 This manuscript is based on protocol version 4.0  
13  
14 63

15  
16 64 **Strengths and limitations of this study**

- 17  
18 65 • Patient selection is not only guided by clinical parameters, but also biomarker-guided by  
19 66 measurement of circulating biologically active plasma adrenomedullin, allowing to select patients  
20 67 with an impaired outcome who may benefit most from Adrecizumab therapy.  
21  
22 68 • Patients will be recruited in medical, surgical and mixed Intensive Care Units at approximately 30  
23 69 sites across 4 countries in Europe, promoting the studies generalizability.  
24  
25 70 • The study has appropriate randomization using random block sequence generation, good  
26 71 allocation concealment, as well as blinding of treating and research personnel.  
27  
28 72 • The key secondary endpoint and primary *efficacy* endpoint is the composite Sepsis Support Index,  
29 73 which combines all-cause mortality and organ dysfunction, aimed to be more sensitive to assess  
30 74 the efficacy of the treatment.  
31  
32 75 • Strict in- and exclusion criteria, as well as the brief time-window for inclusion (within 12 hours  
33 76 following the initiation of vasopressor therapy) may limit generalisation of the results for the  
34 77 entire population of critically ill patients with sepsis, although this may facilitate detection of an  
35 78 efficacy signal.  
36  
37  
38  
39  
40  
41  
42  
43  
44  
45  
46  
47  
48  
49  
50  
51  
52  
53  
54  
55  
56  
57  
58  
59  
60

## 79 Introduction

80 Worldwide, sepsis is a major health problem, with an increasing incidence and high mortality.<sup>1-3</sup> It is  
81 defined as life-threatening organ dysfunction caused by a dysregulated host response to infection.<sup>4</sup>  
82 Septic shock is defined as a subset of sepsis in which profound circulatory, cellular, and metabolic  
83 abnormalities occur, which are associated with an increased risk of mortality.<sup>4</sup> The most prominent  
84 abnormalities are vasodilation and loss of vascular integrity, resulting in hypotension, and ultimately,  
85 in organ dysfunction and death.<sup>5</sup> Besides antibiotics and organ supportive therapies such as  
86 vasopressors, mechanical ventilation and renal replacement therapy (RRT), there are currently no  
87 sepsis-specific adjunctive therapies registered.

88  
89 Adrenomedullin (ADM) is a vasoactive peptide hormone that plays an important role in sepsis.  
90 Circulating ADM exerts endothelial barrier-stabilizing effects and maintains vascular integrity.<sup>6-10</sup>  
91 ADM has vasodilatory properties in the vascular interstitium, and at high concentrations, as observed  
92 during sepsis, may contribute to hypotension.<sup>11-13</sup> Elevated concentrations of plasma ADM at  
93 admission have been reported in septic patients, and these were correlated with vasopressor  
94 requirement, organ dysfunction and mortality.<sup>14-16</sup> The cut-off value of biologically active ADM (bio-  
95 ADM) of 70 pg/mL at admission was found to predict mortality for sepsis patients.<sup>14</sup> This cut-off has  
96 been validated in independent, large multicentre studies.<sup>15 17 18</sup>

97  
98 Based on these data, ADM may be an interesting therapeutic target for sepsis. A potential new  
99 adjunctive therapy for the treatment of septic shock is Adrecizumab (previously also known as  
100 HAM8101). It is a *non-neutralizing* ADM-binding antibody that has shown beneficial effects in  
101 preclinical studies. Adrecizumab reduced vascular leakage, organ dysfunction and need for  
102 vasopressor treatment during cecal ligation and puncture (CLP) induced sepsis in several animal  
103 studies, and improved urine output and survival.<sup>19-21</sup> Importantly, Adrecizumab administration was not  
104 associated with any safety concerns in the first-in-human phase I study in healthy volunteers (n=24)<sup>22-</sup>  
105 <sup>24</sup> and in a follow-up study in healthy volunteers which were intravenously challenged with  
106 lipopolysaccharide (LPS) to induce systemic inflammation (also n=24).<sup>23 24</sup> Of note, in the latter study,



1  
2  
3 107 LPS-induced flu-like symptoms resolved more swiftly in Adrecizumab-treated subjects compared to  
4  
5 108 the placebo group. Pharmacokinetic analysis of Adrecizumab showed a half-life of approximately 14  
6  
7 109 days, indicating that administration of a single dose is sufficient to achieve excess of plasma  
8  
9 110 concentrations of the antibody over adrenomedullin for the entire sepsis period.

10  
11 111  
12 112 Based on these preclinical and human phase I data, it is hypothesised that therapeutic use of  
13  
14 113 Adrecizumab may improve endothelial dysfunction, restore and maintain vascular integrity and  
15  
16 114 augment hemodynamics in critically ill patients with sepsis and septic shock. In the trial described in  
17  
18 115 the present work, the safety, tolerability and efficacy of Adrecizumab is investigated in patients with  
19  
20 116 early septic shock and elevated concentrations of circulating bio-ADM. This will be one of the first  
21  
22 117 precision medicine, biomarker-guided studies in septic patients.  
23  
24 118

## 25 26 119 **Methods and analysis**

### 27 28 120 *Design and setting*

29  
30 121 AdrenOSS-2 is a phase II, randomized, double blind, placebo-controlled, biomarker-guided, proof of  
31  
32 122 concept and dose-finding clinical trial that is currently being conducted in patients with early septic  
33  
34 123 shock and elevated concentration of circulating bio-ADM (> 70 pg/ml). A total of 300 patients will be  
35  
36 124 recruited in medical, surgical and mixed Intensive Care Units (ICU) at approx. 30 sites across  
37  
38 125 Belgium, France, Germany, the Netherlands and Italy (see [clinicaltrials.gov](http://clinicaltrials.gov) of a list of current  
39  
40 126 centres). Patient selection is guided by clinical parameters as well as by biomarker concentrations, by  
41  
42 127 measuring circulating bio-ADM (sphingotest<sup>®</sup> bio-ADM, sphingotec GmbH, Hennigsdorf,  
43  
44 128 Germany).<sup>25</sup> Based upon preclinical studies, two dosages of Adrecizumab will be investigated (2 and 4  
45  
46 129 mg/kg bodyweight), in addition to a placebo control arm. After informed consent has been signed by  
47  
48 130 the patient or his/her legal representative, circulating bio-ADM concentrations will be assessed. If bio-  
49  
50 131 ADM concentrations are > 70 pg/mL, the clinical coordination center (CCC) will be contacted for  
51  
52 132 final confirmation of patient eligibility and the patient will be randomized. An interim analysis for  
53  
54 133 futility is planned after 150 patients have completed day 28 of the study. An overview of the study  
55  
56 134 design is depicted in Figure 1 and study procedures in Figure 2.

1  
2  
3 135 *Primary objective*

4 136 The primary objective is safety and tolerability, consisting of: mortality possibly related to  
5  
6 137 Adrecizumab, interruption of infusion due to suspected intolerability of Adrecizumab, new treatment-  
7  
8 138 emergent adverse events possibly related to Adrecizumab, and changes in severity and frequency of  
9  
10 139 treatment-emergent adverse events. During the study, an independent Data and Safety Monitoring  
11  
12 140 Board (DSMB) will review safety data on at least a monthly base.  
13

14  
15 141

16 142 *Secondary objectives*

17  
18 143 The secondary objectives are related to the efficacy and pharmacokinetics (PK) of Adrecizumab. The  
19  
20 144 primary efficacy endpoint, the “Sepsis Support Index” (SSI), is a composite endpoint reflecting organ  
21  
22 145 dysfunction or death within the first 14 days of follow-up. More precisely: within the first 14 days of  
23  
24 146 follow-up, every day on which a vasopressor or mechanical ventilation is used, or renal dysfunction  
25  
26 147 (defined as renal SOFA = 4) is apparent, or the patient is not alive anymore, is counted as 1. The sum  
27  
28 148 over the 14 day follow-up period is defined as the SSI score, which can have a maximum of 14 and a  
29  
30 149 minimum of 1 (as vasopressor usage on day 1 is an inclusion criteria). The calculation of the SSI is  
31  
32 150 further illustrated in Figure 3.

33  
34 151 Additional secondary objectives include: SSI at day 28 of follow-up, penalized SSI (pSSI) (patients  
35  
36 152 who die get penalized with the maximum score), individual SSI components, persistent organ  
37  
38 153 dysfunction or death at day 14 and 28 of follow-up<sup>26</sup>, day 28 and day 90 mortality rate and quality of  
39  
40 154 life (Euro-QoL-5), change over time in SOFA and other parameters such as functional parameters  
41  
42 155 (including, but not limited to heart rate, blood pressure, PaO<sub>2</sub>/FiO<sub>2</sub>, fluid balance, blood lactate,  
43  
44 156 creatinine, pro-enkephalin, MR-proADM, inflammatory markers, including PCT and IL-6), total  
45  
46 157 duration of vasopressor/catecholamine use, as well as length of stay at ICU/ hospital.

47  
48 158 For the PK sub-study (n=80 patients), endpoints are key PK parameters, including peak plasma  
49  
50 159 concentrations [C<sub>max</sub>], systemic exposure [AUC], volume of distribution [V], systemic clearance [CL]  
51  
52 160 and elimination half-life [t<sub>1/2</sub>] of Adrecizumab.  
53

54  
55 161

56 162 *Patient selection*

1  
2  
3 163 A total of 300 adult patients with early septic shock and elevated bio-ADM concentration will be  
4  
5 164 randomized. Early septic shock is defined as sepsis with hypotension (MAP < 65 mmHg) refractory to  
6  
7 165 fluid resuscitation and requiring vasopressor therapy.<sup>4</sup> Patients with a measurement of circulating bio-  
8  
9 166 ADM > 70 pg/mL will be eligible to be randomized. The cut-off point for bio-ADM of 70 pg/mL was  
10  
11 167 selected based on the specific needs and purpose of this study. Per patient data available for this  
12  
13 168 evaluation included data from the ALBIOS, Frog-ICU and AdrenOSS-1 studies, to name the largest  
14  
15 169 and most relevant, as well as data from healthy normal individuals. Specific needs to be met for the  
16  
17 170 study were that patients with normal bio-ADM, as well as low severity and low expected mortality  
18  
19 171 were to be excluded, to maximise the observable treatment effect, while keeping the eligible  
20  
21 172 population as large as possible. The window for inclusion and infusion of study medication is 12 hours  
22  
23 173 following initiation of vasopressor therapy. A lactate concentration > 2 mmol/L is not an inclusion  
24  
25 174 criteria, as concentrations may change quickly in response to initial therapy. Patients will be screened  
26  
27 175 for clinical inclusion and exclusion criteria (Table 1). Screening and enrolment logs will be maintained  
28  
29 176 for all patients. For patients not enrolled in the study, the reason for non-enrolment is documented.  
30  
31 177 Patients will undergo various screening assessments, including recording of information on hospital  
32  
33 178 and ICU admission (date, time, location before admission, diagnosis, origin of sepsis), documenting of  
34  
35 179 relevant ongoing conditions, relevant medical history and comorbidities present or treated within the  
36  
37 180 last year (cardiovascular and non-cardiovascular), concomitant medication use, age, gender, ethnic  
38  
39 181 origin, physical examination including weight and height, blood sampling for laboratory examinations  
40  
41 182 and bio-ADM measurement, pregnancy test (urine or serum), recording of 12-lead ECG, and  
42  
43 183 calculation of APACHE II and SOFA score. Eligibility will be confirmed by the CCC in Brussels,  
44  
45 184 Belgium. Patients that fulfil all inclusion criteria and none of the exclusion criteria will be eligible to  
46  
47 185 be randomized.

48 186

49  
50 187 **Table 1.** In- and exclusion criteria.51  
52 188 **Inclusion criteria**

- 53 189 1. Written informed consent by patient or legal representative (according to country – specific regulations)
- 54 190 2. Male and female patient, age  $\geq$  18 years
- 55 191 3. Body weight 50 – 120 kg
- 56 192 4. Bio-ADM concentration > 70 pg/mL
- 57 193 5. Patient with early septic shock (start of vasopressor therapy < 12 hours)

1  
2  
3 194 6. Women of childbearing potential must have a negative serum or urine pregnancy test before randomization  
4 195 and have to use a highly effective method of contraception  
5 196

6 197 **Exclusion criteria**

- 7 198 1. Moribund  
8 199 2. Pre-existing unstable condition (e.g. a recent cerebral hemorrhage or infarct, a recent acute unstable  
9 200 myocardial infarction (all < 3 months), congestive heart failure - New York Heart Association (NYHA) Class IV  
10 201 3. Patients that required cardiopulmonary resuscitation in the last 4 weeks prior to evaluation for enrollment  
11 202 4. Severe Chronic Obstructive Pulmonary Disease (COPD) with chronic oxygen need at home (GOLD IV)  
12 203 5. Any organ or bone marrow transplant within the past 24 weeks  
13 204 6. Uncontrolled serious hemorrhage ( $\geq 2$  units of blood / platelets in the previous 24 hrs.). Patients may be  
14 205 considered for enrollment if bleeding has stopped and patient is otherwise qualified  
15 206 7. Uncontrolled hematological / oncological malignancies  
16 207 8. Absolute neutropenia < 500 per  $\mu\text{L}$   
17 208 9. Severe chronic liver disease (Child-Pugh C)  
18 209 10. Systemic fungal infection or active tuberculosis  
19 210 11. Neuromuscular disorders that impact breathing / spontaneous ventilation  
20 211 12. Burns > 30% of body surface  
21 212 13. Plasmapheresis  
22 213 14. Women who are pregnant or nursing  
23 214 15. Participation in a clinical trial involving another investigational drug within 4 weeks prior to inclusion  
24 215 16. Unwilling or unable to be fully evaluated for all follow-up visits  
25 216

26 217 *Measuring bio-ADM*

27 218 For measurement of bio-ADM, 5 mL EDTA blood will be collected after written informed consent is  
28 219 obtained. After centrifugation (2500G, 15 minutes, 20°C), bio-ADM levels are determined using a  
29 220 fully validated, CE-marked, commercially available immunoluminometric assay (sphingotest<sup>®</sup> bio-  
30 221 ADM assay, sphingotec GmbH, Hennigsdorf, Germany). This assay is performed locally by trained  
31 222 personnel. The assay is highly specific for C-terminally amidated adrenomedullin (the biologically  
32 223 active form of adrenomedullin, hence named bio-ADM). Each patient sample will be measured in  
33 224 duplicate, and in parallel two calibrators (one with a concentration around the decision making point  
34 225 (70 pg/mL)) will be run in triplicate along with each patient sample. The functionality of the  
35 226 measuring system will be checked on a monthly basis at each site. Finally, bio-ADM will be re-  
36 227 measured from banked aliquots in batch at a central lab to verify locally gained results. Further details  
37 228 about the assay are described elsewhere.<sup>25</sup>  
38  
39

40 229

41 230 *Randomization*

42 231 Patients are randomly assigned to receive active treatment (2 mg/kg Adrecizumab, 4 mg/kg  
43 232 Adrecizumab) or placebo, using a block randomization scheme (1:1:2 treatment allocation ratio). A  
44 233 randomization code list will be generated by an independent statistician not involved in the study. For  
45  
46  
47  
48  
49

1  
2  
3 234 each center, study medication is provided in boxes containing 4 pairs of vials according to the 4-block-  
4  
5 235 randomization list, allowing stratification by center.

6  
7 236

8  
9 237 *Informed consent*

10 238 Prior to any study-related procedures, patients must provide informed consent in accordance with the  
11  
12 239 EU Clinical Trial Directive, the Declaration of Helsinki and ICH-GCP requirements. Informed consent  
13  
14 240 is obtained according to local requirements in Belgium, France, Germany and the Netherlands. Written  
15  
16 241 informed consent is obtained by trained investigators after providing adequate verbal and written  
17  
18 242 information about the study (in order to fully understand the study and any risks it entails), and giving  
19  
20 243 the patient opportunity to ask questions and appropriate time to decide on participation in the study.  
21  
22 244 For patients unable to provide consent themselves due to their medical condition written informed  
23  
24 245 consent is to be obtained by the patient's legal representative or by other accepted procedures  
25  
26 246 according to applicable national law and local regulations, e.g. consent by relatives or family  
27  
28 247 members. In addition, retrospective patient consent to voluntarily continue the study will be obtained  
29  
30 248 once the patient has sufficiently recovered. Patient and/or the patient's legal representatives can  
31  
32 249 withdraw their consent on study participation at any time without providing an explanation.

33  
34 250

35  
36 251 *Blinding*

37  
38 252 The study will be performed in a double-blinded fashion. All study personnel, including the  
39  
40 253 investigator and site staff, patients, monitors, sponsor and CRO staff will be blinded to treatment  
41  
42 254 assignment until study closure. The randomization list is kept strictly confidential by the data  
43  
44 255 management vendor and accessible only to authorized persons who are not involved in the conduct of  
45  
46 256 the study. In case of emergency, blinding will only be broken if specific emergency treatment would  
47  
48 257 be indicated by knowing the treatment status of the patient. Specific emergency envelopes will be  
49  
50 258 available at each site. The investigator is required to notify the sponsor within 24 hours following the  
51  
52 259 code break reporting the reason for unblinding. The investigational drug and its matching placebo are  
53  
54 260 indistinguishable and all study drug kits will be packed in the same way. Unblinding will be

1  
2  
3 261 authorised by the sponsor after completion of the study, locking of the database and performance of a  
4  
5 262 blinded data review.

6  
7 263

8  
9 264 *Study intervention*

10 265 A single dose of the study drug (2 or 4 mg/kg Adrecizumab, or placebo) is administered over a 1 hour  
11  
12 266 period by continuous intravenous infusion, as soon as possible, but at the latest, within 12 hours  
13  
14 267 following start of vasopressor therapy. Study drug is administered separately from any concomitant  
15  
16 268 drugs using a dedicated lumen of a central venous catheter or a separate peripheral line. Study  
17  
18 269 medication is provided in boxes according to the 4-block-randomization list. Each box contains 4 pairs  
19  
20 270 of vials for a 1:1:2 treatment allocation ratio. The following pairs of vials are supplied in the box, in a  
21  
22 271 blinded fashion: a set of 2 vials of Adrecizumab (for reconstitution of the 4 mg/kg dose), a set of 1 vial  
23  
24 272 of Adrecizumab and 1 vial of placebo (for reconstitution of the 2 mg/kg dose) and two sets of two  
25  
26 273 placebo vials. All vials are indistinguishable from each other, containing the same volume of solution,  
27  
28 274 the same aqueous buffer and identical packaging. The study drug, adjusted to the patient's body  
29  
30 275 weight, has to be reconstituted from a pair of vials. All study drug are stored in a secure and  
31  
32 276 adequately temperature-monitored pharmacy storage facility at 2 – 8°C.

33  
34 277

35  
36 278 *Concomitant medication*

37  
38 279 There are no specific restrictions regarding use of concomitant medication or other therapies. All  
39  
40 280 patients will be treated according to “International Guidelines for Management of Severe Sepsis and  
41  
42 281 Septic Shock”.<sup>27</sup> All concomitant medical treatments and medication will be recorded from inclusion  
43  
44 282 until day 28 or ICU discharge (whichever comes first).

45  
46 283

47  
48 284 *Patient and public involvement*

49  
50 285 Patients and the public were not involved in elaboration of the study protocol. There is no plan to  
51  
52 286 disseminate the results directly to the study participants. Results will be published in a peer-reviewed  
53  
54 287 journal and presented on conferences.

55  
56 288

## 289 **Statistical and analytical plan**

### 290 *Sample size calculations*

291 The sample size was calculated for the primary efficacy endpoint (SSI up to day 14). A sample size of  
292  $n=150$  patients is planned for the combined treatment groups receiving 2 and 4 mg/kg Adrecizumab.  
293 As both dosages result in an excess of antibody over the target peptide ADM, no difference in  
294 treatment effect is expected between the dosage groups. Therefore, the two dosage groups are pooled  
295 together for the final analysis, unless either dose is insufficient or safety and tolerability analysis  
296 indicate that one dose is not safe or tolerable. Power calculation was based on simulation analyses.  
297 The distribution of the SSI was based on real patient data from the ALBIOS study ( $n=539$ )<sup>15</sup> and  
298 underlying assumptions were re-evaluated using results from the AdrenOSS-1 observational study.<sup>18</sup>  
299 Based on the previously conducted observational AdrenOSS-1 study<sup>18</sup> performed in septic patients, we  
300 anticipate a median SSI in the control group of 4 [IQR 2-11], while in the ALBIOS study<sup>15</sup> the median  
301 was 7 (IQR 4-14) (these medians reflect a selection of patients with septic shock and bio-ADM larger  
302 70 pg/mL). However, due to the non-normal distribution of the SSI, the median is still highly volatile  
303 (the majority of patients have either a low SSI (1-3 days, if improving and discharged early), or a high  
304 SSI (14 days, as patients that die within the first 14 days are usually on organ support while alive and  
305 in ICU)). For the simulations, a sample size of  $n=150$  per group (treatment or placebo), and an effect  
306 size resulting in an approximately 10% decrease in SSI in the Adrecizumab-treatment group  
307 (compared to the simulated control group) resulted in a power of the study of more than 80% to  
308 demonstrate an improvement of SSI of  $> 0$  with at least 80% probability. The 80% probability  
309 corresponds to the lower limit of the 60%-confidence interval of the effect estimate, delta SSI, which  
310 is based on the estimated difference of location from the Wilcoxon test. If the simulated lower limit of  
311 delta SSI was  $> 0$ , the simulation run reached the endpoint

312

### 313 *Statistical analyses*

314 Continuous variables will be summarized by the number of patients, mean, SD or median, quartile and  
315 range, as appropriate. Categorical variables will be summarized using number and percentage by  
316 category. Demographic and medical background data, secondary endpoints and safety variables will



1  
2  
3 317 be analyzed by means of descriptive and exploratory methods. Regarding the primary endpoint  
4  
5 318 (safety), all AEs will be listed. The number and percentage of patients experiencing 1 or more AEs  
6  
7 319 will be summarized by treatment arm / control group, relationship to study drug and severity/grade.  
8  
9 320 SAE specific listings for each patient population will be generated on reported SAEs, but not as  
10  
11 321 SUSARs. The same will be made for related severe AEs. Mortality analysis is described below.

12  
13 322 The primary analysis for efficacy will be performed as an intention-to-treat analysis based on the  
14  
15 323 combined dosage groups of Adrecizumab (n=150 patients total) versus placebo. A secondary analysis  
16  
17 324 will compare the two doses for differences in efficacy. In case patients did not receive the treatment  
18  
19 325 they were randomized to, an analysis based on the actual treatment will also be performed (as-treated-  
20  
21 326 analysis). The primary efficacy endpoint, 14-day SSI, will be analyzed using the non-parametric  
22  
23 327 Wilcoxon test, to estimate the treatment effects (based on the Wilcoxon estimate for difference in  
24  
25 328 location) as well as its confidence interval. First, it will be determined whether the improvement in SSI  
26  
27 329 due to treatment is  $> 0$  with at least 80% probability (based on the lower limit of the one-sided  
28  
29 330 confidence interval of the effect estimate of the Wilcoxon test). If this is achieved, the classical p-  
30  
31 331 value from the Wilcoxon test will also be calculated. All-cause mortality will be evaluated using  
32  
33 332 Kaplan-Meier plots comparing treatment (separate for each dose, as well as a comparison combining  
34  
35 333 both doses into one group) versus placebo (log-rank test) and Cox regression modelling including  
36  
37 334 covariates to adjust for potential confounders. Potential confounders include age, gender, MAP, HR,  
38  
39 335 source of infection, blood culture, comorbidities and initial SOFA score, as well as variables showing  
40  
41 336 significant between-group differences (despite randomization). In order to identify subgroups which  
42  
43 337 may possibly benefit more from Adrecizumab treatment, interactions with other drugs, as well as  
44  
45 338 exploratory subgroup analyses are planned in patients defined by disease severity, biomarkers,  
46  
47 339 concomitant medication or other clinical data. The subgroup analyses is nevertheless purely  
48  
49 340 exploratory. Subgroups will be defined by tertiles for continuous variables. For categorical variables,  
50  
51 341 categories will be summarized such that they best represent tertiles if more than 3 categories are  
52  
53 342 available. Statistical analysis of secondary endpoints is exploratory, and will be specified in a separate  
54  
55 343 statistical analysis plan, which is to be finished before conclusion of the study.

56  
57 344



1  
2  
3 345 *Interim analysis with futility stop*

4 346 An unblinded interim analysis is planned after 50% of patients completed the study on day 28. The  
5  
6 347 study will be terminated if the probability of a positive outcome after of all patients is below 40%,  
7  
8 348 based on the primary efficacy endpoint 14 day SSI. In case the futility stop is reached, but if some of  
9  
10 349 the other efficacy endpoints show a promising outcome for the full study, the futility stop may be  
11  
12 350 suspended. Statistical consequence of applying the futility analysis was included in the power  
13  
14 351 simulation. An independent statistician is responsible for analysing the data at interim analysis, and the  
15  
16 352 steering committee, as well as the sponsor, will remain blinded until the end of the study. Note that the  
17  
18 353 interim analysis focuses on futility only, potential termination of the trial based on harm is based on  
19  
20 354 the reviewing and evaluation of unblinded data on safety and mortality by the DSMB (described  
21  
22 355 further below).  
23  
24  
25

26 357 **Data quality assurance**

27  
28 358 All data management activities are done according to ICH-GCP as required by regulatory agencies. A  
29  
30 359 commercial Contract Research Organisation (CRO), M.A.R.C.O. GmbH & Co. KG (M.A.R.C.O.<sup>®</sup>),  
31  
32 360 will be responsible for data management. All sites will maintain source documentation and enter  
33  
34 361 patient data into an electronic case report form (eCRF). The clinical center is responsible for the secure  
35  
36 362 and restrictive archiving of source data for at least 15 years or until the written notification from the  
37  
38 363 sponsor that the documents are no longer required. During the required period, the clinical center will  
39  
40 364 ensure that archived data and documents will be undamaged, legible and accessible to the sponsor  
41  
42 365 and/or for regulatory purposes, if required. The study master file, the ECRFs, code envelopes and  
43  
44 366 other material supplied for the performance of the study will be retained by the sponsor according to  
45  
46 367 applicable regulations and laws, including the new GDPR (see also the section on confidentiality).  
47  
48 368 Regarding the eCRF, automated and manual checks will be performed to ensure completeness and  
49  
50 369 consistency of the data, and investigator site personnel seeking access must go through training  
51  
52 370 processes before access to the system is granted. The eCRF was designed by M.A.R.C.O.<sup>®</sup> in the  
53  
54 371 Amedon system. Validation checks are implemented in the system or programmed with SAS<sup>®</sup>, version  
55  
56 372 9.1 or higher, according to the data validation plan set up by M.A.R.C.O.<sup>®</sup>.

1  
2  
3 373

4  
5 374 *Missing data*

6  
7 375 In general, missing data in clinical variables will not be replaced or imputed. If missing data should  
8  
9 376 occur in variables required for secondary efficacy endpoints (e.g. SOFA score or other secondary  
10  
11 377 efficacy endpoints), a sensitivity analysis will be conducted assigning missing endpoint data with the  
12  
13 378 worst possible value (as defined for withdrawals), in addition to the analysis based on valid data only.

14  
15 379 In addition, an analysis will be conducted where missing data points will be imputed using inter- or  
16  
17 380 extrapolation, with the exception that missing Bilirubin will be set to normal (liver SOFA component  
18  
19 381 = 0). Missing follow up time information will not be replaced for mortality analysis, but rather treated  
20  
21 382 as respective methods for survival analysis intend.

22  
23 383

24  
25 384 **Safety assessments**

26  
27 385 *Medication error*

28  
29 386 Adequately trained hospital staff will prepare, double-check and administer study medication. The  
30  
31 387 dose levels that are administered in the study have not caused any safety concerns in previous studies  
32  
33 388 in healthy volunteers<sup>22-24</sup> or in preclinical safety and toxicological studies in animals and non-human  
34  
35 389 primates. The risk for adverse health effects due to medication errors are thought to be minimal.

36  
37 390

38  
39 391 *Overdose risks*

40  
41 392 No drug specific antidote for Adrecizumab is available. An overdose is defined as any dose higher  
42  
43 393 than the assigned treatment dose. However, if by accident, the maximum volume would be withdrawn  
44  
45 394 from a pair of Adrecizumab vials during preparation of study medication, this would not exceed the  
46  
47 395 tested maximum dose of 8 mg/kg Adrecizumab in healthy volunteers, which did not result in any  
48  
49 396 safety concerns.<sup>22-24</sup>

50  
51 397

52  
53 398 *AE reporting*

54  
55 399 All patients are monitored for adverse events (AEs). AEs are defined as any untoward medical  
56  
57 400 occurrence in a patient administered a product and which does not necessarily have a causal

1  
2  
3 401 relationship with this treatment. Investigators must document all AEs (whether serious or non-serious  
4  
5 402 and judged related or unrelated to the study drug) that occur during the study period extending from  
6  
7 403 day 1 (inclusion) until 90 days after study drug administration in the eCRF. If the AE is serious, a  
8  
9 404 ‘serious adverse event report form’ must also be sent to the safety contact of the sponsor (spm<sup>2</sup>, Safety  
10  
11 405 Projects & more GmbH, Hirschberg an der Bergstraße, Germany) within 24 hours of becoming aware  
12  
13 406 of the SAE. The severity of the AE will be rated as “mild”, “moderate”, “severe”, “life-threatening”,  
14  
15 407 “disabling” or “death related to event”. Investigators will use medical judgement to determine whether  
16  
17 408 there is evidence for a causal relationship and will describe this causality using terms such as  
18  
19 409 “certain”, “probably/likely”, “possible”, “unlikely” or “unrelated”. All AEs will be followed-up until  
20  
21 410 they have abated, or until a stable situation has been reached, and will be reported as such.

22 411

#### 23 412 *External data monitoring committee*

24  
25  
26 413 An independent DSMB has been established to monthly review safety data including SAEs and,  
27  
28 414 overall safety data, and will judge the relevance of events for patient safety. DSMB members will have  
29  
30 415 no direct relationship to the study or to the study sponsor. The DSMB, composed by two clinical  
31  
32 416 experts in the field of sepsis, a biostatistician and a pharmacovigilance representative, will operate  
33  
34 417 independently. The DSMB is empowered to recommend changes in the design of the study to ensure  
35  
36 418 the safety of the patients and scientific integrity of the study.

37 419

#### 38 420 **Withdrawal**

39  
40  
41  
42 421 Participation is strictly voluntary and a patient or their legal representative may withdraw the patient  
43  
44 422 from the study at any time without providing an explanation. This will not affect his/her right for  
45  
46 423 future medical care. If a patient would withdraw from the study, the date, circumstances and any  
47  
48 424 reason provided will be documented on the withdrawal page of the eCRF. No study specific data or  
49  
50 425 patient material will be collected after withdrawal of consent. No data obtained after withdrawal of  
51  
52 426 consent will be recorded on eCRFs, unless the patient consents to the use thereof. For safety analysis,  
53  
54 427 the patient’s outcome status (dead or alive) at day 90 will be collected. For the main efficacy analysis,  
55  
56 428 these patients will be excluded. In order to rule out that patient withdrawal is linked to treatment, a

1  
2  
3 429 sensitivity analysis will be conducted assigning missing endpoint data with the worst possible value  
4  
5 430 (i.e. worst possible value for patients in the treatment group, the best possible value for patients in the  
6  
7 431 control group). In addition, an analysis will be conducted where missing data points will be imputed  
8  
9 432 using inter- or extrapolation, if applicable.

10  
11 433

#### 12 434 **Study period**

13  
14 435 The study started enrolling patients in December 2017. The estimated study enrolment completion  
15  
16 436 date is anticipated in the first half of 2019. Please note that this manuscript was finalized prior to the  
17  
18 437 interim analysis.

19  
20 438

#### 21 439 **Ethics and dissemination**

##### 22 440 *Ethics*

23  
24 441 The study was started after approval of the study protocol and all other relevant study documents by  
25  
26 442 the relevant institutional review boards / independent ethics committees. The study is performed in  
27  
28 443 accordance with the Declaration of Helsinki, ICH, Code of Federal regulations and all other applicable  
29  
30 444 regulations. Collection of personal data is performed according to country-specific regulations.

31  
32 445

##### 33 446 *Confidentiality*

34  
35 447 After written informed consent has been obtained, patients will be assigned a unique 6-digit patient  
36  
37 448 identification number. This allows identification of patients, while maintaining patient confidentiality.

38  
39 449 The investigators, designated CRO and sponsor and all other involved parties will preserve the  
40  
41 450 confidentiality of all patients taking part in the study, in accordance with ICH-GCP and local  
42  
43 451 regulations. Confidentiality of all patient identities will be maintained, except during source data  
44  
45 452 verification when monitors, auditors and other authorized agents of the sponsor or its designee, the  
46  
47 453 ethics committee or any other applicable regulatory authorities are granted direct access to the study  
48  
49 454 patient's original medical records. No material bearing a patient's name will be kept on file by the  
50  
51 455 CRO or sponsor. The code list with treatment allocations (randomization list) is stored separately from  
52  
53 456 the Sponsor at the data management vendor (CRO) during the course of the study. These data

1  
2  
3 457 management vendors will provide all relevant data (pseudonymized) to the sponsor after the end of the  
4  
5 458 study. In addition, sets of sealed envelopes with randomization codes are kept at the site for  
6  
7 459 emergency unblinding, with the DSMB, and with the party responsible for reporting SUSARs as  
8  
9 460 required by regulatory agencies. Data retained from this study will be protected in accordance with all  
10  
11 461 applicable legal requirements. Information about study patients will be kept confidential and managed  
12  
13 462 according to the requirements of EU-directives 2001/20/EC, 2005/28/EC and 2003/63/EC, and  
14  
15 463 relevant national and local legislation. All ongoing subjects signed the ICF (including the data  
16  
17 464 protection part) and additionally the “Information letter for ongoing Patients” regarding the new  
18  
19 465 GDPR/(DSGVO, Germany). All patients have been informed by investigators before they signed these  
20  
21 466 documents.

22 467

#### 24 468 *Data access*

26 469 The following parties have access to the data: sponsor, sites and selected vendors (data management,  
28 470 pharmacovigilance). Individual patient data may be used by site investigators for publication in  
30 471 agreement with the sponsor. Please note that the confidentiality section also specifies some external  
32 472 parties that may access data (regulatory authorities, etc.).

34 473

#### 36 474 *Sample storage*

38 475 A biobank for biomarkers is implemented and samples are stored for potential future use.

40 476

#### 42 477 *Study monitoring*

44 478 The study is monitored by a clinical monitor, who will visit the investigator and study sites at periodic  
46 479 intervals in addition to phone, letter and e-mail contact. The monitor will follow the study closely  
48 480 through reviewing of study records and source documents, and will determine if the reported data are  
50 481 accurate and complete.

52 482

#### 54 483 *Dissemination policy*

1  
2  
3 484 The data of the study will be reported at scientific meetings and published in a peer-reviewed scientific  
4  
5 485 journal, regardless of the results on outcome, in accordance with the good publication practice  
6  
7 486 guideline of the international society for medical publication professionals. The sponsor and the  
8  
9 487 investigator and other individuals who have expertise in the area and who are willing to interpret the  
10  
11 488 data and write or review articles and presentations will form a publication Steering Committee to  
12  
13 489 oversee the preparation of articles and presentations from this study.  
14  
15 490

## 16 491 **Discussion**

17  
18 492 The development of new therapies for the treatment of sepsis and septic shock has proven to be a  
19  
20 493 challenging task over the last decades. Many trials have investigated potential adjunctive therapies,  
21  
22 494 predominantly focussing on anti-inflammatory agents. Unfortunately, this enormous effort put into  
23  
24 495 dozens of clinical trials has not yielded compounds with clinically relevant beneficial effects. This can  
25  
26 496 be explained by many factors, such as heterogeneous study populations and difficulties in selecting  
27  
28 497 patients who may best benefit from an intervention. Also, the timing of the intervention, inappropriate  
29  
30 498 outcome measures and the complexity of the disease with multiple pathways of injury hamper clinical  
31  
32 499 research in sepsis patients.<sup>5 28</sup>

33  
34 500 Importantly, when antibodies were used, most interventions were based on complete neutralization of  
35  
36 501 the target. However, physiology probably is more balanced as some targets can exert both beneficial  
37  
38 502 and detrimental effects, often even simultaneously. This may also represent a major contributing factor  
39  
40 503 to the failure of many therapies to improve outcome witnessed in the last decades. Along these lines, it  
41  
42 504 might be argued that a partially neutralizing therapy is more effective than total neutralization. The  
43  
44 505 AdrenOSS-2 trial is an innovative, biomarker driven trial with a novel, supposedly clinically relevant  
45  
46 506 efficacy endpoint.

47  
48 507  
49  
50 508 Patient heterogeneity is a substantial contributor to the difficulties in identifying effective therapies for  
51  
52 509 sepsis. Patient selection is innovative in this study for two reasons. First, a more homogeneous  
53  
54 510 subgroup of sepsis patients is selected, based on the combination of presence of early signs of shock,  
55  
56 511 i.e. requiring vasopressor support, as well as elevated concentration of the biomarker bio-ADM.

1  
2  
3 512 Selecting patients in the early phase of septic shock should select patients with preventable organ  
4 513 dysfunction compared to patients for whom septic shock and need of vasopressors lasted more than 12  
5 514 hours. Furthermore, as previously described, measuring bio-ADM at baseline correlates strongly with  
6 515 the need for organ supporting therapy and mortality.<sup>14 15 17 18</sup> Therefore, including bio-ADM as an  
7 516 inclusion criteria likely allows for better selection of patients who not only need vasopressor but also  
8 517 with a poor outcome. Combining need of vasopressor and high bio-ADM may contribute to obtaining  
9 518 a more homogeneous population of patients whom may benefit most from this adjunctive sepsis  
10 519 therapy. To our knowledge, this is one of the first precision medicine study in sepsis patients.<sup>29</sup>

11  
12  
13  
14  
15  
16  
17  
18  
19 520

20 521 ADM is a key vasoactive peptide involved in several important pathways in sepsis, which makes it an  
21 522 attractive therapeutic target in sepsis.<sup>10</sup> It has previously been described as a double-edged sword in  
22 523 sepsis.<sup>30</sup> On vascular smooth muscle cells, ADM exerts vasodilatory effects and thereby induces  
23 524 vasodilation and hypotension.<sup>11-13</sup> This effect of interstitial ADM may exacerbate the severity of shock  
24 525 and may lead to organ hypoperfusion and organ dysfunction. In contrast, ADM present in the  
25 526 circulation exerts potent endothelial barrier stabilizing effects, reducing vascular leakage that may  
26 527 improve survival, as was demonstrated in *in vitro*<sup>6 7 31 32</sup> and *in vivo* in animal models of sepsis and  
27 528 systemic inflammation.<sup>8 9 33 34</sup> However, direct administration of ADM during sepsis poses several  
28 529 limitations. Because of a short half-life,<sup>11</sup> continuous infusion of ADM would be required. In addition,  
29 530 due to ADM's potent vasodilative effects, ADM-induced hypotension might be an issue, which might  
30 531 further aggravate shock in septic patients. A non-neutralizing antibody might attenuate ADM's  
31 532 vasodilatory effects on VSMCs and potentiate ADM's effects on endothelial cells.

32  
33  
34  
35  
36  
37  
38  
39  
40  
41  
42  
43  
44  
45 533

46 534 Adrecizumab, a *non-neutralizing* ADM-binding antibody, is one of the first therapies specifically  
47 535 aimed at improving vascular endothelial barrier function, and represents a new candidate drug for the  
48 536 treatment of septic shock. A detailed description of Adrecizumab's supposed mode of action is  
49 537 described elsewhere.<sup>35</sup> Briefly, during sepsis, increased concentrations of ADM in the interstitial  
50 538 compartment are thought to contribute to hypotension. Adrecizumab, which is confined to the blood  
51 539 compartment, shifts the distribution of ADM away from the interstitium towards the blood, by

1  
2  
3 540 preventing diffusion of bound ADM.<sup>35</sup> This results in a strong increase of (bound) ADM  
4  
5 541 concentrations in the blood,<sup>22 23 24</sup> where it, being bound to a non-neutralizing antibody, interacts with  
6  
7 542 receptors on endothelial cells and reduces vascular leakage and tissue edema. At the same time,  
8  
9 543 concentrations in the interstitium are reduced through this mechanism, leading to less vasodilation and  
10  
11 544 subsequent hypotension. This increase in plasma ADM concentration was observed in a rapid and  
12  
13 545 dose dependent manner upon i.v. administration of Adrecizumab, both in animals and in humans.<sup>21-24</sup>  
14  
15 546 Through reducing vascular leakage, tissue edema and hypotension, Adrecizumab could increase tissue  
16  
17 547 perfusion and improve the prognosis of sepsis patients, whereas it might also reduce the use of  
18  
19 548 vasopressors, thereby limiting potential adverse effects of vasopressors.<sup>36 37</sup>  
20  
21 549 Adrecizumab, administered as a single intravenous dose (due to its long half-life of 14 days), showed  
22  
23 550 promising results in preclinical studies of systemic inflammation and septic shock, including  
24  
25 551 attenuation of vascular leakage, lower vasopressor infusion rates and less organ dysfunction, related to  
26  
27 552 improved survival.<sup>19-21</sup>  
28  
29 553  
30  
31 554 Substantial effort has been directed at reducing mortality in sepsis patients. Nevertheless, all major  
32  
33 555 sepsis trials have failed to improve survival. Although survival is a clear and relevant end-point, it may  
34  
35 556 be too insensitive to demonstrate a beneficial effect of a novel intervention. Therefore, novel endpoints  
36  
37 557 beyond all-cause mortality should be considered.<sup>38</sup> The use of composite endpoints allows for a more  
38  
39 558 nuanced assessment of morbidity and mortality. A new composite endpoint, the “Sepsis Support  
40  
41 559 Index” (SSI), is used in the present study as the primary efficacy endpoint. The SSI is a composite  
42  
43 560 index reflecting days on organ supportive therapy (hemodynamics, pulmonary), days with organ  
44  
45 561 dysfunction (renal), as well as all-cause mortality. These organ systems were improved by  
46  
47 562 Adrecizumab administration in preclinical models, and support of these organ systems defines ICU  
48  
49 563 care, indicating that a therapeutic effect is of clinical relevance. The SSI is thought to allow for earlier  
50  
51 564 and more sensitive observations of possible clinically relevant beneficial effects of Adrecizumab  
52  
53 565 compared to more traditional primary efficacy endpoints.  
54  
55 566



1  
2  
3 567 Potential limitations of the study include strict in- and exclusion criteria and a short window for patient  
4 568 inclusion (within 12 hours following vasopressor therapy). These limitations result in a more  
5 569 homogenous study population, but they may make recruitment more difficult and limit the  
6 570 generalizability of the results.  
7  
8  
9

10 571  
11  
12 572 In conclusion, despite the exponential increase of knowledge gathered in the last decades pertaining  
13 573 the pathophysiology of septic shock, this has not translated to effective therapeutic interventions and  
14 574 as a consequence, this condition remains to have an unacceptable high morbidity and mortality. The  
15 575 AdrenOSS-2 trial is one of the first personalized medicine trial in septic shock patients, aimed at  
16 576 characterizing the safety and efficacy of the ADM-binding antibody Adrecizumab in septic shock  
17 577 patients with elevated concentrations of bio-ADM. The trial incorporates a number of innovative  
18 578 features such as biomarker guided patient selection and a novel efficacy endpoint in its design to avoid  
19 579 pitfalls of previous sepsis trials. Adrecizumab represents a promising approach to treat this lethal  
20 580 syndrome. The results of this proof-of-concept and dose-finding phase II trial are eagerly awaited, and  
21 581 will importantly aid the design of future trials with this drug.  
22  
23  
24  
25  
26  
27  
28  
29  
30  
31

32 582

### 33 583 **Acknowledgements**

34 584 The authors thank the staff and patients participating in the study. In addition, the authors would like  
35 585 to thank Joachim Struck for critically reviewing the manuscript.  
36  
37  
38  
39

40 586

### 41 587 **Contributors**

42 588 CG and AB drafted the manuscript. The manuscript was critically reviewed by MK, OH, PS, JZ, GM,  
43 589 PFL, AM and PP. All authors read and approved the final manuscript for publication.  
44  
45  
46  
47

48 590

### 49 591 **Funding**

50 592 This work was supported by Adrenomed AG (the study sponsor; contact Dr. Jens Zimmermann,  
51 593 [jzimmermann@adrenomed.com](mailto:jzimmermann@adrenomed.com)).  
52  
53  
54  
55

56 594  
57  
58  
59  
60

1  
2  
3 595 **Competing interests**

4 596 C. Geven and A. Blet received travel reimbursements from Adrenomed AG. M. Kox declares to have  
5  
6 597 no competing interests. O. Hartmann, P. Scigalla and J. Zimmerman are employed by Adrenomed AG.  
7  
8 598 G. Marx received travel reimbursements and consultancy fees from Adrenomed AG. PF. Laterre  
9  
10 599 received travel reimbursements and consultancy fees from Adrenomed AG A. Mebazaa received travel  
11  
12 600 reimbursements from Adrenomed AG. UMR-S 942 Inserm received a research grant from Adrenomed  
13  
14 601 AG. P. Pickkers received travel reimbursements and consultancy fees from Adrenomed AG. P.  
15  
16 602 Pickkers's institution received a research grant from Adrenomed AG. Adrenomed AG reviewed this  
17  
18 603 manuscript. Adrenomed AG holds patent rights on anti-ADM antibodies.  
19

20 604  
21  
22  
23  
24  
25  
26  
27  
28  
29  
30  
31  
32  
33  
34  
35  
36  
37  
38  
39  
40  
41  
42  
43  
44  
45  
46  
47  
48  
49  
50  
51  
52  
53  
54  
55  
56  
57  
58  
59  
60

605 **References**

- 606 1. Gaieski DF, Edwards JM, Kallan MJ, et al. Benchmarking the incidence and mortality of  
607 severe  
608 sepsis in the United States. *Critical Care Med* 2013;41:1167-74. doi:  
609 10.1097/CCM.0b013e31827c09f8 [published Online First: 28 February 2013]
- 610 2. Fleischmann C, Scherag A, Adhikari NK, et al. Assessment of Global Incidence and Mortality  
611 of Hospital-treated Sepsis. Current Estimates and Limitations. *Am J Respir Crit Care Med*  
612 2016;193:259-72. doi: 10.1164/rccm.201504-0781OC [published Online First: 29 September  
613 2015]
- 614 3. Vincent JL, Marshall JC, Namendys-Silva SA, et al. Assessment of the worldwide burden of  
615 critical illness: the intensive care over nations (ICON) audit. *Lancet Respir Med* 2014;2:380-6.  
616 doi: 10.1016/s2213-2600(14)70061-x [published Online First: 18 April 2014]
- 617 4. Singer M, Deutschman CS, Seymour CW, et al. The Third International Consensus  
618 Definitions for Sepsis and Septic Shock (Sepsis-3). *JAMA* 2016;315:801-10. doi:  
619 10.1001/jama.2016.0287 [published Online First: 24 February 2016]
- 620 5. Gotts JE, Matthay MA. Sepsis: pathophysiology and clinical management. *BMJ*  
621 2016;353:i1585. doi: 10.1136/bmj.i1585 [published Online First: 25 May 2016]
- 622 6. Hippenstiel S, Witzenrath M, Schmeck B, et al. Adrenomedullin reduces endothelial  
623 hyperpermeability. *Circ Res* 2002;618-25.
- 624 7. Hocke AC, Temmesfeld-Wollbrueck B, Schmeck B, et al. Perturbation of endothelial junction  
625 proteins by *Staphylococcus aureus* alpha-toxin: inhibition of endothelial gap formation by  
626 adrenomedullin. *Histochem Cell Biol* 2006;126:305-16. doi: 10.1007/s00418-006-0174-5  
627 [published Online First: 6 April 2006]
- 628 8. Temmesfeld-Wollbrueck B, Brell B, David I, et al. Adrenomedullin reduces vascular  
629 hyperpermeability and improves survival in rat septic shock. *Intensive Care Med*  
630 2007;33:703-10. doi: 10.1007/s00134-007-0561-y [published Online First: 24 February 2007]
- 631 9. Muller-Redetzky HC, Will D, Hellwig K, et al. Mechanical ventilation drives pneumococcal  
632 pneumonia into lung injury and sepsis in mice: protection by adrenomedullin. *Crit Care*  
633 2014;18:R73. doi: 10.1186/cc13830 [published Online First: 16 April 2014]
- 634 10. Geven C, Kox M, Pickkers P. Adrenomedullin and Adrenomedullin-Targeted Therapy As  
635 Treatment Strategies Relevant for Sepsis. *Front Immunol* 2018;9:292. doi:  
636 10.3389/fimmu.2018.00292 [published Online First: 10 March 2018]
- 637 11. Meeran K, O'Shea D, Upton PD, et al. Circulating adrenomedullin does not regulate systemic  
638 blood pressure but increases plasma prolactin after intravenous infusion in humans: a  
639 pharmacokinetic study. *J Clin Endocrinol Metab* 1997;82:95-100. doi:  
640 10.1210/jcem.82.1.3656 [published Online First: 1 January 1997]
- 641 12. Lainchbury JG, Troughton RW, Lewis LK, et al. Hemodynamic, hormonal, and renal effects  
642 of short-term adrenomedullin infusion in healthy volunteers. *J Clin Endocrinol Metab*  
643 2000;85:1016-20. doi: 10.1210/jcem.85.3.6422 [published Online First: 17 March 2000]
- 644 13. Troughton RW, Lewis LK, Yandle TG, et al. Hemodynamic, hormone, and urinary effects of  
645 adrenomedullin infusion in essential hypertension. *Hypertension* 2000;36:588-93. [published  
646 Online First: 21 October 2000]
- 647 14. Marino R, Struck J, Maisel AS, et al. Plasma adrenomedullin is associated with short-term  
648 mortality and vasopressor requirement in patients admitted with sepsis. *Crit Care*  
649 2014;18:R34. doi: 10.1186/cc13731 [published Online First: 19 February 2014]
- 650 15. Caironi P, Latini R, Struck J, et al. Circulating biologically active adrenomedullin (bio-ADM)  
651 predicts hemodynamic support requirement and mortality during sepsis. *Chest* 2017 doi:  
652 10.1016/j.chest.2017.03.035 [published Online First: 16 April 2017]
- 653 16. Nishio K, Akai Y, Murao Y, et al. Increased plasma concentrations of adrenomedullin  
654 correlate with relaxation of vascular tone in patients with septic shock. *Crit Care Med*  
655 1997;25:953-7. [published Online First: 1 June 1997]
- 656 17. Blet A, et al. Bioactive adrenomedullin, organ support therapies and survival in the critically  
657 ill: Results from the FROG-ICU study. *Submitted* 2018.

- 1  
2  
3 658 18. Mebazaa A, et al. Circulating adrenomedullin estimates survival and reversibility of organ  
4 659 failure in sepsis: The prospective observational multinational Adrenomedullin and Outcome in  
5 660 Sepsis and Septic Shock (AdrenOSS) Study. *Submitted* 2018.
- 6 661 19. Struck J, Hein F, Karasch S, et al. Epitope specificity of anti-Adrenomedullin antibodies  
7 662 determines efficacy of mortality reduction in a cecal ligation and puncture mouse model.  
8 663 *Intensive Care Med Exp* 2013;1:22. doi: 10.1186/2197-425x-1-3 [published Online First: 1  
9 664 December 2013]
- 10 665 20. Wagner K, Wachter U, Vogt JA, et al. Adrenomedullin binding improves catecholamine  
11 666 responsiveness and kidney function in resuscitated murine septic shock. *Intensive Care Med*  
12 667 *Exp* 2013;1:21. doi: 10.1186/2197-425x-1-2 [published Online First: 1 December 2013]
- 13 668 21. Geven C, Peters E, Schroedter M, et al. Effects of the Humanized Anti-Adrenomedullin  
14 669 Antibody Adrecizumab (HAM8101) on Vascular Barrier Function and Survival in Rodent  
15 670 Models of Systemic Inflammation and Sepsis. *Shock* 2018. doi:  
16 671 10.1097/shk.0000000000001102 [published Online First: 13 January 2018]
- 17 672 22. Geven C, Kox M, Scigalla P, et al. Safety, tolerability and pharmacokinetics/-dynamics of the  
18 673 anti-adrenomedullin antibody Adrecizumab: a first in man study [Abstract]. *Intensive Care*  
19 674 *Med Exp* 2017;5(suppl 2).
- 20 675 23. Geven C, van Lier D, ten Elzen B, et al. The safety, tolerability and pharmacokinetics/-  
21 676 dynamics of the selective anti-adrenomedullin antibody Adrecizumab during experimental  
22 677 human endotoxemia [abstract]. *Neth J Crit Care* 2018;26:30-31.
- 23 678 24. Geven C, van Lier D, Blet A, et al. Safety, tolerability and pharmacokinetics/dynamics of the  
24 679 adrenomedullin antibody Adrecizumab in a first-in-human study and during experimental  
25 680 human endotoxemia in healthy subjects. *British Journal of Clinical Pharmacology*  
26 681 2018;84:2129-41. [published Online First: 1 Jun 2018]
- 27 682 25. Weber J, Sachse J, Bergmann S, et al. Sandwich Immunoassay for Bioactive Plasma  
28 683 Adrenomedullin. *J Appl Lab Med* 2017;2:222-233.
- 29 684 26. Heyland DK, Muscedere J, Drover J, et al. Persistent organ dysfunction plus death: a novel,  
30 685 composite outcome measure for critical care trials. *Crit Care* 2011;15:R98. doi:  
31 686 10.1186/cc10110 [published Online First: 23 March 2011]
- 32 687 27. Rhodes A, Evans LE, Alhazzani W, et al. Surviving Sepsis Campaign: International Guidelines  
33 688 for Management of Sepsis and Septic Shock: 2016. *Intensive Care Med* 2017;43:304 – 377.  
34 689 doi: 10.1007/s00134-017-4683-6.
- 35 690 28. Fink MP, Warren HS. Strategies to improve drug development for sepsis. *Nat Rev Drug*  
36 691 *Discov* 2014;13:741-58. doi: 10.1038/nrd4368 [published Online First: 6 September 2014]
- 37 692 29. Pickkers P, Kox M. Towards precision medicine for sepsis patients. *Crit Care* 2017;21:11.  
38 693 doi: 10.1186/s13054-016-1583-z [published Online First: 13 January 2017]
- 39 694 30. Kox M, Pickkers P. Adrenomedullin: its double-edged sword during sepsis slices yet again.  
40 695 *Intensive Care Med Exp*, 2014:1-2.
- 41 696 31. Brell B, Temmesfeld-Wollbrück B, Altschner I, et al. Adrenomedullin reduces  
42 697 *Staphylococcus aureus* alpha-toxin-induced rat ileum microcirculatory damage. *Crit Care Med*  
43 698 2005;33:819-26. [published Online First: 9 April 2005]
- 44 699 32. Temmesfeld-Wollbrück B, Brell B, zu Dohna C, et al. Adrenomedullin reduces intestinal  
45 700 epithelial permeability in vivo and in vitro. *Am J Physiol Gastrointest Liver Physiol*  
46 701 2009;297:G43-51. doi: 10.1152/ajpgi.90532.2008 [published Online First: 9 May 2009]
- 47 702 33. Itoh T, Obata H, Murakami S, et al. Adrenomedullin ameliorates lipopolysaccharide-induced  
48 703 acute lung injury in rats. *Am J Physiol Lung Cell Mol Physiol* 2007;293:L446-52. doi:  
49 704 10.1152/ajplung.00412.2005 [published Online First: 15 June 2007]
- 50 705 34. Muller HC, Witzenrath M, Tschernig T, et al. Adrenomedullin attenuates ventilator-induced  
51 706 lung injury in mice. *Thorax* 2010;65:1077-84. doi: 10.1136/thx.2010.135996 [published  
52 707 Online First: 26 October 2010]
- 53 708 35. Geven C, Bergmann A, Kox M, et al. Vascular Effects of Adrenomedullin and the Anti-  
54 709 Adrenomedullin Antibody Adrecizumab in Sepsis. *Shock* 2018;50:132-40. doi:  
55 710 10.1097/shk.0000000000001103 [published Online First: 13 January 2018]

- 1  
2  
3 711 36. Stolk RF, van der Poll T, Angus DC, et al. Potentially Inadvertent Immunomodulation:  
4 712 Norepinephrine Use in Sepsis. *Am J Respir Crit Care Med* 2016;19:550-8. doi:  
5 713 10.1164/rccm.201604-0862CP [published Online First: 12 July 2016]  
6 714 37. Dunser MW, Hasibeder WR. Sympathetic overstimulation during critical illness: adverse  
7 715 effects of adrenergic stress. *J Intensive Care Med* 2009;24:293-316. doi:  
8 716 10.1177/0885066609340519 [published Online First: 26 August 2009]  
9 717 38. Mebazaa A, Laterre PF, Russell JA, et al. Designing phase 3 sepsis trials: application of  
10 718 learned experiences from critical care trials in acute heart failure. *J Intensive Care* 2016;4:24.  
11 719 doi: 10.1186/s40560-016-0151-6 [published Online First: 2 April 2016]  
12 720  
13 721  
14  
15  
16  
17  
18  
19  
20  
21  
22  
23  
24  
25  
26  
27  
28  
29  
30  
31  
32  
33  
34  
35  
36  
37  
38  
39  
40  
41  
42  
43  
44  
45  
46  
47  
48  
49  
50  
51  
52  
53  
54  
55  
56  
57  
58  
59  
60

For peer review only

1  
2  
3 722 **Figure and table legends**  
4  
5 723  
6  
7 724 **Figure 1.** Study design.  
8  
9 725  
10  
11 726 **Figure 2.** Study timeline.  
12  
13 727  
14  
15 728 **Figure 3.** Primary *efficacy* endpoint: 14-day Sepsis Support Index (SSI): example calculation.  
16  
17 729  
18  
19 730 **Table 1.** In- and exclusion criteria.  
20  
21  
22  
23  
24  
25  
26  
27  
28  
29  
30  
31  
32  
33  
34  
35  
36  
37  
38  
39  
40  
41  
42  
43  
44  
45  
46  
47  
48  
49  
50  
51  
52  
53  
54  
55  
56  
57  
58  
59  
60

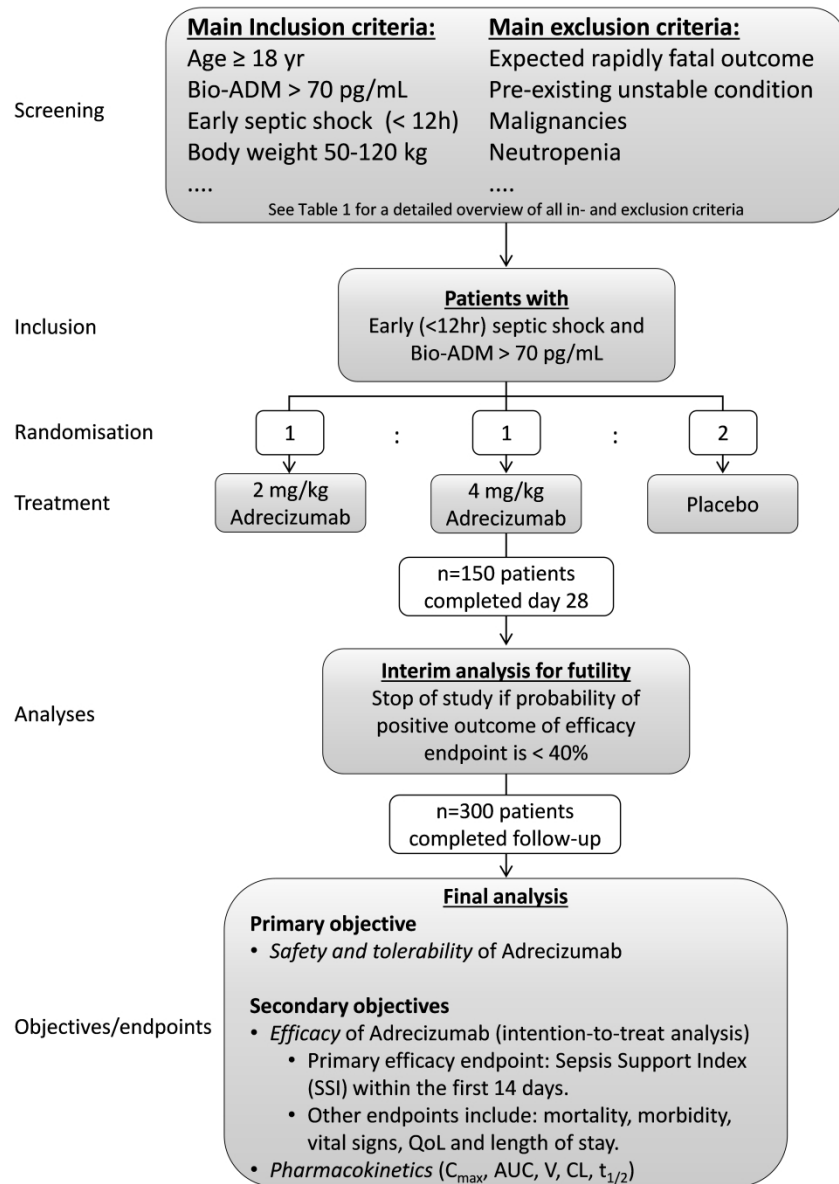

Figure 1. Study design.

1187x1625mm (96 x 96 DPI)

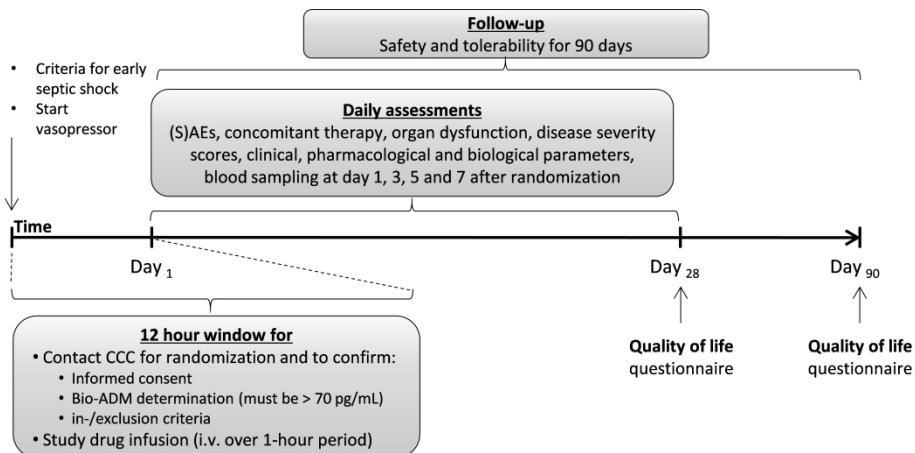

Figure 2. Study timeline.

1186x568mm (96 x 96 DPI)



1  
2  
3  
4  
5  
6  
7  
8  
9  
10  
11  
12  
13  
14  
15  
16  
17  
18  
19  
20  
21  
22  
23  
24  
25  
26  
27  
28  
29  
30  
31  
32  
33  
34  
35  
36  
37  
38  
39  
40  
41  
42  
43  
44  
45  
46  
47  
48  
49  
50  
51  
52  
53  
54  
55  
56  
57  
58  
59  
60

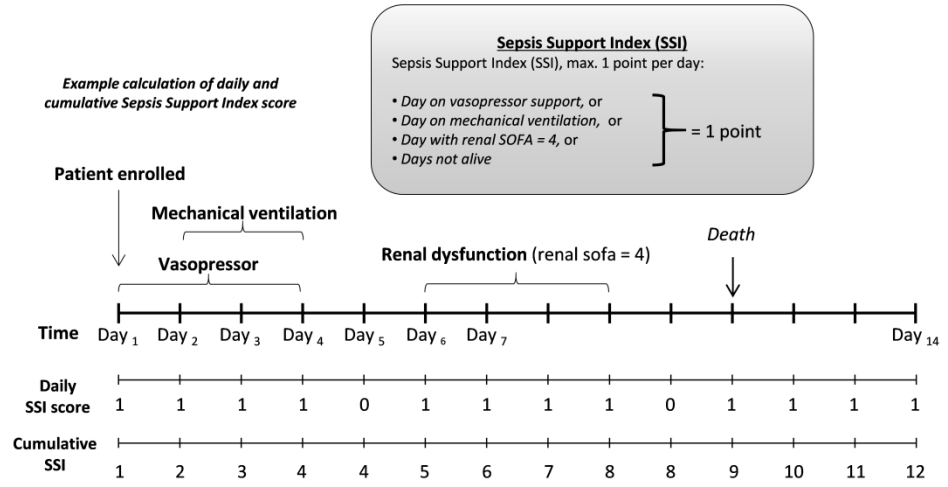

Figure 3. Primary efficacy endpoint: 14-day Sepsis Support Index (SSI): example calculation.

1237x630mm (96 x 96 DPI)

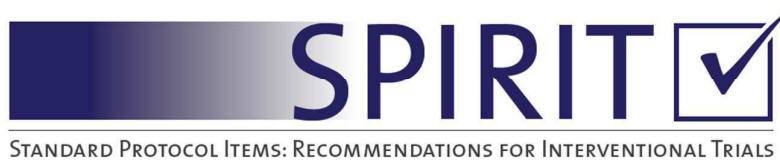

SPIRIT 2013 Checklist: Recommended items to address in a clinical trial protocol and related documents\*

| Section/item                      | Item No | Description                                                                                                                                                                                                                                                                                                                      |
|-----------------------------------|---------|----------------------------------------------------------------------------------------------------------------------------------------------------------------------------------------------------------------------------------------------------------------------------------------------------------------------------------|
| <b>Administrative information</b> |         |                                                                                                                                                                                                                                                                                                                                  |
| Title                             | 1       | Descriptive title identifying the study design, population, interventions, and, if applicable, trial acronym<br><b>Page 1, lines 3-6.</b>                                                                                                                                                                                        |
| Trial registration                | 2a      | Trial identifier and registry name. If not yet registered, name of intended registry<br><b>Page 3, line 60.</b>                                                                                                                                                                                                                  |
|                                   | 2b      | All items from the World Health Organization Trial Registration Data Set<br><b>This information (e.g. sponsor, countries of recruitment, contacts, etc. can be found in the clinicaltrials.gov registry).</b>                                                                                                                    |
| Protocol version                  | 3       | Date and version identifier<br><b>P. 3, line 62.</b>                                                                                                                                                                                                                                                                             |
| Funding                           | 4       | Sources and types of financial, material, and other support<br><b>P21, lines 591-592.</b>                                                                                                                                                                                                                                        |
| Roles and responsibilities        | 5a      | Names, affiliations, and roles of protocol contributors<br><b>Authors are not specified in the original study protocol. However, the steering committee and Sponsor, who were involved in writing, are listed as authors on the current manuscript.</b>                                                                          |
|                                   | 5b      | Name and contact information for the trial sponsor<br><b>P21, line 591-592.</b>                                                                                                                                                                                                                                                  |
|                                   | 5c      | Role of study sponsor and funders, if any, in study design; collection, management, analysis, and interpretation of data; writing of the report; and the decision to submit the report for publication, including whether they will have ultimate authority over any of these activities<br><b>P17 &amp; P18, lines 483-489.</b> |

- 1  
2  
3  
4  
5  
6  
7  
8  
9  
10  
11  
12  
13
- 5d Composition, roles, and responsibilities of the coordinating centre, steering committee, endpoint adjudication committee, data management team, and other individuals or groups overseeing the trial, if applicable (see Item 21a for data monitoring committee)
- Steering committee members, p1, lines 23-24.  
Data management: p13, lines 358-361.  
Interim analysis: p13, lines 345-455.  
DSMB: p15, lines 413-418.  
Safety contact of the sponsor: p15, lines 403-406.  
Publication steering committee: p18, lines 486-489.

## 14 Introduction

- 15  
16  
17  
18  
19  
20  
21  
22  
23  
24  
25  
26  
27  
28  
29  
30  
31  
32  
33
- Background and rationale
- 6a Description of research question and justification for undertaking the trial, including summary of relevant studies (published and unpublished) examining benefits and harms for each intervention  
P4-5, lines 79-117.
- 6b Explanation for choice of comparators  
P5, lines 125-127.
- Objectives
- 7 Specific objectives or hypotheses  
P6, lines 135-160.
- Trial design
- 8 Description of trial design including type of trial (eg, parallel group, crossover, factorial, single group), allocation ratio, and framework (eg, superiority, equivalence, noninferiority, exploratory)  
P5, lines 120-134.  
Figure 1.

## 34 Methods: Participants, interventions, and outcomes

- 35  
36  
37  
38  
39  
40  
41  
42  
43  
44  
45  
46  
47  
48  
49  
50  
51  
52  
53  
54  
55  
56  
57  
58  
59  
60
- Study setting
- 9 Description of study settings (eg, community clinic, academic hospital) and list of countries where data will be collected. Reference to where list of study sites can be obtained  
P5, lines 123-125.  
References to list included in text.
- Eligibility criteria
- 10 Inclusion and exclusion criteria for participants. If applicable, eligibility criteria for study centres and individuals who will perform the interventions (eg, surgeons, psychotherapists)  
P6-8, lines 162-216.  
Table 1.
- Interventions
- 11a Interventions for each group with sufficient detail to allow replication, including how and when they will be administered  
P10, lines 264-276.

- 1  
2  
3  
4  
5  
6  
7  
8  
9  
10  
11  
12  
13  
14  
15  
16  
17  
18  
19  
20  
21  
22  
23  
24  
25  
26  
27  
28  
29  
30  
31  
32  
33  
34  
35  
36  
37  
38  
39  
40  
41  
42  
43
- 11b Criteria for discontinuing or modifying allocated interventions for a given trial participant (eg, drug dose change in response to harms, participant request, or improving/worsening disease)  
**P13, lines 345-355.**
- 11c Strategies to improve adherence to intervention protocols, and any procedures for monitoring adherence (eg, drug tablet return, laboratory tests)  
**P14, lines 385-396.**  
**P16, lines 451-454.**
- 11d Relevant concomitant care and interventions that are permitted or prohibited during the trial  
**P10, lines 278-282.**
- Outcomes 12 Primary, secondary, and other outcomes, including the specific measurement variable (eg, systolic blood pressure), analysis metric (eg, change from baseline, final value, time to event), method of aggregation (eg, median, proportion), and time point for each outcome. Explanation of the clinical relevance of chosen efficacy and harm outcomes is strongly recommended  
**P6, lines 135-160, and P11-12, lines 313-343.**  
**Figure 3.**
- Participant timeline 13 Time schedule of enrolment, interventions (including any run-ins and washouts), assessments, and visits for participants. A schematic diagram is highly recommended (see Figure)  
**P6-7, lines 172-175.**  
**Figures 1 and 2 contain schematic information.**
- Sample size 14 Estimated number of participants needed to achieve study objectives and how it was determined, including clinical and statistical assumptions supporting any sample size calculations  
**P11, lines 290-311.**
- Recruitment 15 Strategies for achieving adequate participant enrolment to reach target sample size  
**Not specified.**

#### **Methods: Assignment of interventions (for controlled trials)**

##### Allocation:

- 47  
48  
49  
50  
51  
52  
53  
54  
55  
56  
57  
58  
59  
60
- Sequence generation 16a Method of generating the allocation sequence (eg, computer-generated random numbers), and list of any factors for stratification. To reduce predictability of a random sequence, details of any planned restriction (eg, blocking) should be provided in a separate document that is unavailable to those who enrol participants or assign interventions  
**P8, lines 230-235. Figure 1.**

|    |                |     |                                                                         |
|----|----------------|-----|-------------------------------------------------------------------------|
| 1  |                |     |                                                                         |
| 2  | Allocation     | 16b | Mechanism of implementing the allocation sequence (eg, central          |
| 3  | concealment    |     | telephone; sequentially numbered, opaque, sealed envelopes),            |
| 4  | mechanism      |     | describing any steps to conceal the sequence until interventions are    |
| 5  |                |     | assigned                                                                |
| 6  |                |     | <b>P9, lines 251-276.</b>                                               |
| 7  |                |     |                                                                         |
| 8  | Implementation | 16c | Who will generate the allocation sequence, who will enrol participants, |
| 9  |                |     | and who will assign participants to interventions                       |
| 10 |                |     | <b>P8, lines 232-233.</b>                                               |
| 11 |                |     | <b>P5, lines 130-132.</b>                                               |
| 12 |                |     | <b>P10, lines 268-274.</b>                                              |
| 13 |                |     |                                                                         |
| 14 | Blinding       | 17a | Who will be blinded after assignment to interventions (eg, trial        |
| 15 | (masking)      |     | participants, care providers, outcome assessors, data analysts), and    |
| 16 |                |     | how                                                                     |
| 17 |                |     | <b>P9, lines 251-276.</b>                                               |
| 18 |                |     |                                                                         |
| 19 |                |     |                                                                         |
| 20 |                | 17b | If blinded, circumstances under which unblinding is permissible, and    |
| 21 |                |     | procedure for revealing a participant's allocated intervention during   |
| 22 |                |     | the trial                                                               |
| 23 |                |     | <b>P17, lines 458-460.</b>                                              |
| 24 |                |     |                                                                         |

#### Methods: Data collection, management, and analysis

|    |                 |     |                                                                          |
|----|-----------------|-----|--------------------------------------------------------------------------|
| 25 |                 |     |                                                                          |
| 26 |                 |     |                                                                          |
| 27 | Data collection | 18a | Plans for assessment and collection of outcome, baseline, and other      |
| 28 | methods         |     | trial data, including any related processes to promote data quality (eg, |
| 29 |                 |     | duplicate measurements, training of assessors) and a description of      |
| 30 |                 |     | study instruments (eg, questionnaires, laboratory tests) along with      |
| 31 |                 |     | their reliability and validity, if known. Reference to where data        |
| 32 |                 |     | collection forms can be found, if not in the protocol                    |
| 33 |                 |     | <b>P13, lines 357-382.</b>                                               |
| 34 |                 |     | <b>P8, lines 217-228.</b>                                                |
| 35 |                 |     |                                                                          |
| 36 |                 |     |                                                                          |
| 37 |                 | 18b | Plans to promote participant retention and complete follow-up,           |
| 38 |                 |     | including list of any outcome data to be collected for participants who  |
| 39 |                 |     | discontinue or deviate from intervention protocols                       |
| 40 |                 |     | <b>The first is not specified.</b>                                       |
| 41 |                 |     | <b>The second: P15, lines 420-432</b>                                    |
| 42 |                 |     |                                                                          |
| 43 |                 |     |                                                                          |
| 44 | Data            | 19  | Plans for data entry, coding, security, and storage, including any       |
| 45 | management      |     | related processes to promote data quality (eg, double data entry;        |
| 46 |                 |     | range checks for data values). Reference to where details of data        |
| 47 |                 |     | management procedures can be found, if not in the protocol               |
| 48 |                 |     | <b>P13, lines 357-372.</b>                                               |
| 49 |                 |     | <b>P14, lines 398-410.</b>                                               |
| 50 |                 |     |                                                                          |
| 51 | Statistical     | 20a | Statistical methods for analysing primary and secondary outcomes.        |
| 52 | methods         |     | Reference to where other details of the statistical analysis plan can be |
| 53 |                 |     | found, if not in the protocol                                            |
| 54 |                 |     | <b>P11-13, lines 313-355</b>                                             |
| 55 |                 |     |                                                                          |
| 56 |                 |     |                                                                          |
| 57 |                 |     |                                                                          |
| 58 |                 |     |                                                                          |
| 59 |                 |     |                                                                          |
| 60 |                 |     |                                                                          |

- 1  
2  
3  
4  
5  
6  
7  
8  
9  
10
- 20b Methods for any additional analyses (eg, subgroup and adjusted analyses)  
**P12, lines 336-343.**
- 20c Definition of analysis population relating to protocol non-adherence (eg, as randomised analysis), and any statistical methods to handle missing data (eg, multiple imputation)  
**P14, lines 374-382.**

### 11 **Methods: Monitoring**

- 12  
13  
14  
15  
16  
17  
18  
19  
20  
21  
22  
23  
24  
25  
26  
27  
28  
29  
30  
31  
32  
33  
34  
35  
36
- Data monitoring 21a Composition of data monitoring committee (DMC); summary of its role and reporting structure; statement of whether it is independent from the sponsor and competing interests; and reference to where further details about its charter can be found, if not in the protocol. Alternatively, an explanation of why a DMC is not needed  
**P15, lines 412-418.**
- 21b Description of any interim analyses and stopping guidelines, including who will have access to these interim results and make the final decision to terminate the trial  
**P13, lines 345-355.**
- Harms 22 Plans for collecting, assessing, reporting, and managing solicited and spontaneously reported adverse events and other unintended effects of trial interventions or trial conduct  
**P14-15, lines 398-410.**
- Auditing 23 Frequency and procedures for auditing trial conduct, if any, and whether the process will be independent from investigators and the sponsor  
**Not specified**

### 37 **Ethics and dissemination**

- 38  
39  
40  
41  
42  
43  
44  
45  
46  
47  
48  
49  
50  
51  
52  
53  
54  
55  
56  
57  
58  
59  
60
- Research ethics approval 24 Plans for seeking research ethics committee/institutional review board (REC/IRB) approval  
**P16, lines 440-444.**
- Protocol amendments 25 Plans for communicating important protocol modifications (eg, changes to eligibility criteria, outcomes, analyses) to relevant parties (eg, investigators, REC/IRBs, trial participants, trial registries, journals, regulators)  
**Not specified**
- Consent or assent 26a Who will obtain informed consent or assent from potential trial participants or authorised surrogates, and how (see Item 32)  
**P9, lines 327-249.**

|    |                               |     |                                                                                                                                                                                                                                                                                                         |
|----|-------------------------------|-----|---------------------------------------------------------------------------------------------------------------------------------------------------------------------------------------------------------------------------------------------------------------------------------------------------------|
| 1  |                               | 26b | Additional consent provisions for collection and use of participant data and biological specimens in ancillary studies, if applicable                                                                                                                                                                   |
| 2  |                               |     | <b>Not specified in manuscript, however, this is specified in reviewer response (p15).</b>                                                                                                                                                                                                              |
| 3  |                               |     |                                                                                                                                                                                                                                                                                                         |
| 4  |                               |     |                                                                                                                                                                                                                                                                                                         |
| 5  |                               |     |                                                                                                                                                                                                                                                                                                         |
| 6  |                               |     |                                                                                                                                                                                                                                                                                                         |
| 7  | Confidentiality               | 27  | How personal information about potential and enrolled participants will be collected, shared, and maintained in order to protect confidentiality before, during, and after the trial                                                                                                                    |
| 8  |                               |     | <b>P16, lines 446-466.</b>                                                                                                                                                                                                                                                                              |
| 9  |                               |     |                                                                                                                                                                                                                                                                                                         |
| 10 |                               |     |                                                                                                                                                                                                                                                                                                         |
| 11 |                               |     |                                                                                                                                                                                                                                                                                                         |
| 12 | Declaration of interests      | 28  | Financial and other competing interests for principal investigators for the overall trial and each study site                                                                                                                                                                                           |
| 13 |                               |     | <b>P21-22, lines 594-602.</b>                                                                                                                                                                                                                                                                           |
| 14 |                               |     | <b>This is not specified for each participating study site.</b>                                                                                                                                                                                                                                         |
| 15 |                               |     |                                                                                                                                                                                                                                                                                                         |
| 16 |                               |     |                                                                                                                                                                                                                                                                                                         |
| 17 | Access to data                | 29  | Statement of who will have access to the final trial dataset, and disclosure of contractual agreements that limit such access for investigators                                                                                                                                                         |
| 18 |                               |     | <b>P17, lines 468-472.</b>                                                                                                                                                                                                                                                                              |
| 19 |                               |     |                                                                                                                                                                                                                                                                                                         |
| 20 |                               |     |                                                                                                                                                                                                                                                                                                         |
| 21 |                               |     |                                                                                                                                                                                                                                                                                                         |
| 22 |                               |     |                                                                                                                                                                                                                                                                                                         |
| 23 | Ancillary and post-trial care | 30  | Provisions, if any, for ancillary and post-trial care, and for compensation to those who suffer harm from trial participation                                                                                                                                                                           |
| 24 |                               |     | <b>A subject insurance is arranged by the sponsor according to country-specific requirements. This is currently not mentioned in the manuscript (although the fact that the conduct of the study is done according to national legislation, etc. indicates that a mandatory insurance is arranged).</b> |
| 25 |                               |     |                                                                                                                                                                                                                                                                                                         |
| 26 |                               |     |                                                                                                                                                                                                                                                                                                         |
| 27 |                               |     |                                                                                                                                                                                                                                                                                                         |
| 28 |                               |     |                                                                                                                                                                                                                                                                                                         |
| 29 |                               |     |                                                                                                                                                                                                                                                                                                         |
| 30 |                               |     |                                                                                                                                                                                                                                                                                                         |
| 31 |                               |     |                                                                                                                                                                                                                                                                                                         |
| 32 | Dissemination policy          | 31a | Plans for investigators and sponsor to communicate trial results to participants, healthcare professionals, the public, and other relevant groups (eg, via publication, reporting in results databases, or other data sharing arrangements), including any publication restrictions                     |
| 33 |                               |     | <b>P10, lines 284-287.</b>                                                                                                                                                                                                                                                                              |
| 34 |                               |     | <b>P17-18, lines 483-489.</b>                                                                                                                                                                                                                                                                           |
| 35 |                               |     |                                                                                                                                                                                                                                                                                                         |
| 36 |                               |     |                                                                                                                                                                                                                                                                                                         |
| 37 |                               |     |                                                                                                                                                                                                                                                                                                         |
| 38 |                               |     |                                                                                                                                                                                                                                                                                                         |
| 39 |                               |     |                                                                                                                                                                                                                                                                                                         |
| 40 |                               | 31b | Authorship eligibility guidelines and any intended use of professional writers                                                                                                                                                                                                                          |
| 41 |                               |     | <b>P21, lines 587-589.</b>                                                                                                                                                                                                                                                                              |
| 42 |                               |     |                                                                                                                                                                                                                                                                                                         |
| 43 |                               |     |                                                                                                                                                                                                                                                                                                         |
| 44 |                               | 31c | Plans, if any, for granting public access to the full protocol, participant-level dataset, and statistical code                                                                                                                                                                                         |
| 45 |                               |     | <b>Not specified. Currently, the authors do not plan on sharing individual patient data after ending of the study.</b>                                                                                                                                                                                  |
| 46 |                               |     |                                                                                                                                                                                                                                                                                                         |
| 47 |                               |     |                                                                                                                                                                                                                                                                                                         |
| 48 |                               |     |                                                                                                                                                                                                                                                                                                         |
| 49 |                               |     |                                                                                                                                                                                                                                                                                                         |
| 50 | <b>Appendices</b>             |     |                                                                                                                                                                                                                                                                                                         |
| 51 | Informed consent materials    | 32  | Model consent form and other related documentation given to participants and authorised surrogates                                                                                                                                                                                                      |
| 52 |                               |     | <b>Not included.</b>                                                                                                                                                                                                                                                                                    |
| 53 |                               |     |                                                                                                                                                                                                                                                                                                         |
| 54 |                               |     |                                                                                                                                                                                                                                                                                                         |
| 55 |                               |     |                                                                                                                                                                                                                                                                                                         |
| 56 |                               |     |                                                                                                                                                                                                                                                                                                         |
| 57 |                               |     |                                                                                                                                                                                                                                                                                                         |
| 58 |                               |     |                                                                                                                                                                                                                                                                                                         |
| 59 |                               |     |                                                                                                                                                                                                                                                                                                         |
| 60 |                               |     |                                                                                                                                                                                                                                                                                                         |

1  
2 Biological 33 Plans for collection, laboratory evaluation, and storage of biological  
3 specimens for genetic or molecular analysis in the current trial and for  
4 future use in ancillary studies, if applicable  
5 P8, lines 217-228.  
6 P17, lines 474-475.  
7

---

8 \*It is strongly recommended that this checklist be read in conjunction with the SPIRIT 2013  
9 Explanation & Elaboration for important clarification on the items. Amendments to the  
10 protocol should be tracked and dated. The SPIRIT checklist is copyrighted by the SPIRIT  
11 Group under the Creative Commons "[Attribution-NonCommercial-NoDerivs 3.0 Unported](#)"  
12 license.  
13  
14  
15  
16  
17  
18  
19  
20  
21  
22  
23  
24  
25  
26  
27  
28  
29  
30  
31  
32  
33  
34  
35  
36  
37  
38  
39  
40  
41  
42  
43  
44  
45  
46  
47  
48  
49  
50  
51  
52  
53  
54  
55  
56  
57  
58  
59  
60
